# Supplementary material for: Complications after surgical management of proximal humeral fractures: a systematic review of event terms and definitions
Source: Springer Nature journal article supplement (doi:10.1186/s12891-020-03353-8), 2020-05-26
Supplement: MOESM1 [file 18015986]

**Search Results for *Proximal Humerus Fractures***  
**Search protocols:**

-  Advanced search - PubMed - NCBI.pdf
-  Cochrane Library.pdf
-  Embase.pdf
-  Medline.pdf
-  Scopus - Advanced search.pdf

|                 | References | References after Deduplication |
|-----------------|------------|--------------------------------|
| <b>EMBASE</b>   | 1350       | 459                            |
| <b>Medline</b>  | 1302       | 1241                           |
| <b>PubMed</b>   | 163        | 68                             |
| <b>Scopus</b>   | 1576       | 295                            |
| <b>Cochrane</b> | 75         | 17                             |
| <b>Pool</b>     | 4466       | 2080                           |

**Reference files:** Proximal\_humerus\_fractures.enlx

before deduplication:

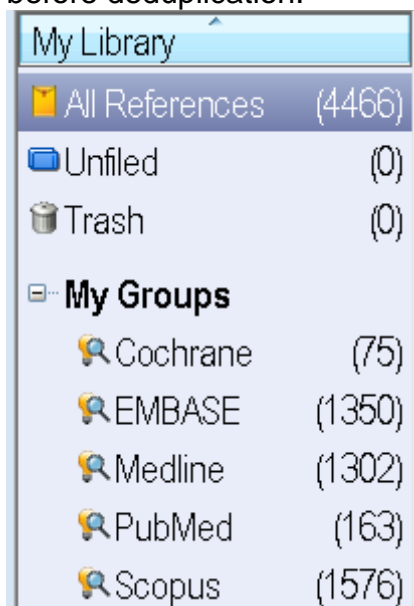

My Library

-  All References (4466)
-  Unfiled (0)
-  Trash (0)
- My Groups**
  -  Cochrane (75)
  -  EMBASE (1350)
  -  Medline (1302)
  -  PubMed (163)
  -  Scopus (1576)

after:

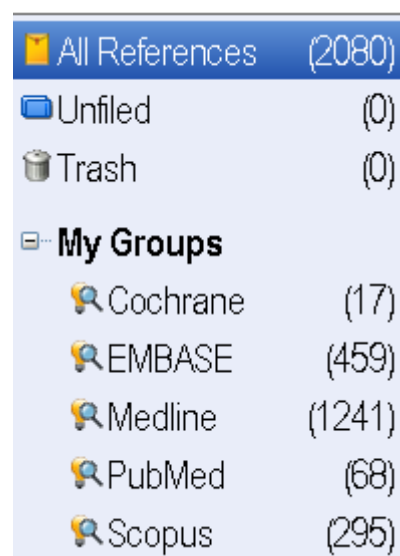

All References (2080)

-  Unfiled (0)
-  Trash (0)
- My Groups**
  -  Cochrane (17)
  -  EMBASE (459)
  -  Medline (1241)
  -  PubMed (68)
  -  Scopus (295)

Search > Mapping ▾ Date ▾ Sources ▾ Fields ▾ Quick limits ▾ EBM ▾ Pub. types ▾ Languages ▾ Gender ▾ Age ▾ Animal ▾ Search tips ▾

## Results Filters

+ Expand — Collapse all

Apply >

## History

Save | Delete | Print view | Export | Email

Combine >

using  And  Or

^ Collapse

- | History                      | Search                                                                                                                                                                                                                                                                                                                                                                                                                                                                                                                                                                                                                                                                                                                                                                                                                                                                                                                                                                                                                                                                                                                                                                                                                                                                                                                                                                                                                                                                                                                                                                                                                                                                                                                                                                                                                                                             | Results                                                                   |
|------------------------------|--------------------------------------------------------------------------------------------------------------------------------------------------------------------------------------------------------------------------------------------------------------------------------------------------------------------------------------------------------------------------------------------------------------------------------------------------------------------------------------------------------------------------------------------------------------------------------------------------------------------------------------------------------------------------------------------------------------------------------------------------------------------------------------------------------------------------------------------------------------------------------------------------------------------------------------------------------------------------------------------------------------------------------------------------------------------------------------------------------------------------------------------------------------------------------------------------------------------------------------------------------------------------------------------------------------------------------------------------------------------------------------------------------------------------------------------------------------------------------------------------------------------------------------------------------------------------------------------------------------------------------------------------------------------------------------------------------------------------------------------------------------------------------------------------------------------------------------------------------------------|---------------------------------------------------------------------------|
| <input type="checkbox"/> #20 | #3 AND #16 NOT [conference abstract]/lim AND ([english]/lim OR [french]/lim OR [german]/lim)                                                                                                                                                                                                                                                                                                                                                                                                                                                                                                                                                                                                                                                                                                                                                                                                                                                                                                                                                                                                                                                                                                                                                                                                                                                                                                                                                                                                                                                                                                                                                                                                                                                                                                                                                                       | 1,350                                                                     |
| <input type="checkbox"/> #19 | #3 AND #16 NOT [conference abstract]/lim                                                                                                                                                                                                                                                                                                                                                                                                                                                                                                                                                                                                                                                                                                                                                                                                                                                                                                                                                                                                                                                                                                                                                                                                                                                                                                                                                                                                                                                                                                                                                                                                                                                                                                                                                                                                                           | 1,483                                                                     |
| <input type="checkbox"/> #18 | #3 AND #16 AND [conference abstract]/lim                                                                                                                                                                                                                                                                                                                                                                                                                                                                                                                                                                                                                                                                                                                                                                                                                                                                                                                                                                                                                                                                                                                                                                                                                                                                                                                                                                                                                                                                                                                                                                                                                                                                                                                                                                                                                           | 96                                                                        |
| <input type="checkbox"/> #17 | #3 AND #16                                                                                                                                                                                                                                                                                                                                                                                                                                                                                                                                                                                                                                                                                                                                                                                                                                                                                                                                                                                                                                                                                                                                                                                                                                                                                                                                                                                                                                                                                                                                                                                                                                                                                                                                                                                                                                                         | 1,579                                                                     |
| <input type="checkbox"/> #16 | #4 OR #15                                                                                                                                                                                                                                                                                                                                                                                                                                                                                                                                                                                                                                                                                                                                                                                                                                                                                                                                                                                                                                                                                                                                                                                                                                                                                                                                                                                                                                                                                                                                                                                                                                                                                                                                                                                                                                                          | 5,072,247                                                                 |
| <input type="checkbox"/> #15 | 'hematoma'/exp OR 'infection rate'/exp OR 'frozen shoulder'/exp OR 'shoulder impingement syndrome'/exp OR 'rotator cuff injury'/exp OR 'neurological complication'/exp OR 'femur head necrosis'/exp OR 'screw loosening'/exp OR 'reoperation'/exp OR 'operative blood loss'/exp OR 'postoperative hemorrhage'/exp OR 'blood transfusion'/exp OR 'pneumothorax'/exp OR infection:ab,ti OR impingement:ab,ti OR 'frozen shoulder':ab,ti OR breakage:ab,ti OR necrosis:ab,ti OR ((screw OR wire) NEAR/3 (perforation OR cutout OR 'cut out' OR loosening OR backing)):ab,ti OR ('rotator cuff' NEAR/3 (lesion OR injury OR tendinopath* OR disease OR disorder* OR symptom* OR tear)):ab,ti OR ((implant OR prosthesis* OR plate) NEAR/5 (loosen* OR tear* OR wear OR migration OR subluxation OR luxation OR removal OR displace* OR fail* OR dislocat* OR instab* OR malpositioning OR loosening)):ab,ti OR ((wound OR implant OR prosthetic) NEAR/5 infect*):ab,ti OR (septic NEAR/5 (arthritis OR prosthesis*)):ab,ti OR osteolysis:ab,ti OR impinge*:ab,ti OR stiffness:ab,ti OR hematoma*:ab,ti OR haematoma*:ab,ti OR thrombosis*:ab,ti OR impair*:ab,ti OR palsy:ab,ti OR palsies:ab,ti OR disability*:ab,ti OR mortality:ab,ti OR death:ab,ti OR dead:ab,ti OR reoperation*:ab,ti OR pneumothorax:ab,ti OR refracture*:ab,ti OR malunion:ab,ti OR 'mal union':ab,ti OR nonunion:ab,ti OR 'non union':ab,ti OR 'fracture displacement':ab,ti OR 'scapular notching':ab,ti OR 'heterotopic ossification':ab,ti OR 'post-traumatic osteoarthritis':ab,ti OR 'posttraumatic osteoarthritis':ab,ti OR (blood NEAR/3 (loss OR transfusion)):ab,ti OR (fixation NEAR/3 (problem* OR loss)):ab,ti OR (tuberosity* NEAR/3 (resorption OR dislocation OR migration OR reduction OR displacement)):ab,ti OR 'glenoid erosion':ab,ti OR (gleno* NEAR/3 degenerat*):ab,ti | 3,897,460                                                                 |
| <input type="checkbox"/> #4  | 'adverse outcome'/exp OR 'treatment failure'/exp OR 'postoperative OR complication':ab,ti OR (adverse NEAR/3 (effect* OR event* OR outcome OR reaction*)):ab,ti OR (postoperative NEAR/3 (complication* OR pain OR fail* OR injur* OR fractur*)):ab,ti OR ((persistent OR movement OR shoulder OR syndrome) NEAR/3 pain):ab,ti                                                                                                                                                                                                                                                                                                                                                                                                                                                                                                                                                                                                                                                                                                                                                                                                                                                                                                                                                                                                                                                                                                                                                                                                                                                                                                                                                                                                                                                                                                                                     | <a href="#">Edit</a> <a href="#">Email alert</a> <a href="#">RSS feed</a> |
| <input type="checkbox"/> #3  | #1 AND #2                                                                                                                                                                                                                                                                                                                                                                                                                                                                                                                                                                                                                                                                                                                                                                                                                                                                                                                                                                                                                                                                                                                                                                                                                                                                                                                                                                                                                                                                                                                                                                                                                                                                                                                                                                                                                                                          | 2,202                                                                     |
| <input type="checkbox"/> #2  | 'shoulder arthroplasty'/exp OR 'shoulder prosthesis'/exp OR 'conservative treatment'/exp OR 'internal fixator'/exp OR 'intramedullary nailing'/exp OR 'plate fixation'/exp OR 'bone screw'/exp OR ((conservative OR nonoperative OR 'non operative' OR nonsurgical OR 'non surgical') NEAR/3 (management OR therapy OR treatment)):ab,ti OR (shoulder NEAR/3 (arthroplast* OR replacement* OR prosthesis* OR endoprosthesis*)):ab,ti OR ((internal OR pin OR rod OR nail) NEAR/3 (fixation OR fixator*)):ab,ti OR ((bone OR closed OR intramedullary OR medullary) NEAR/3 (nailing OR pinning OR plating)):ab,ti OR (plate* NEAR/3 (locking OR stabilization OR stabilization OR fixation OR osteosynthesis OR philos OR lphp)):ab,ti OR (surgical NEAR/3 (management OR treatment OR therapy OR approach OR technique* OR procedure*)):ab,ti OR surgery:ab,ti                                                                                                                                                                                                                                                                                                                                                                                                                                                                                                                                                                                                                                                                                                                                                                                                                                                                                                                                                                                                     | 1,924,156                                                                 |
| <input type="checkbox"/> #1  | 'proximal humerus fracture'/exp OR ('shoulder fracture'/exp OR 'humerus fracture'/exp AND (proximal:ab,ti OR periprosthes*:ab,ti OR 'peri implant*':ab,ti)) OR ('periprosthetic fracture'/exp AND (humeral:ab,ti OR humerus:ab,ti OR shoulder*:ab,ti)) OR (((proximal OR periprosthes* OR 'peri implant*') NEAR/6 fracture*):ab,ti AND ((humeral OR humerus OR shoulder) NEAR/9 fracture*):ab,ti)                                                                                                                                                                                                                                                                                                                                                                                                                                                                                                                                                                                                                                                                                                                                                                                                                                                                                                                                                                                                                                                                                                                                                                                                                                                                                                                                                                                                                                                                  | 3,215                                                                     |

1,350 results for search #20 | [Show all abstracts](#)

1 — 25 >

## Results

View | Print | Export | Email | Order | Add to Clipboard

Select number of items

Selected: 1350 (clear)

Sort by:  Relevance

Publication Year

Entry Date

1

Treatment of periprosthetic and peri-implant fractures: Modern plate osteosynthesis procedures

- Raschke M.J., Stange R., Kösters C.  
*Chirurg* 2012 83:8 (749-762)  
MEDLINE [Abstract](#) [Index Terms](#) [View Full Text](#) 
- 
- 2 Internal fixation of proximal humerus fractures using the locking proximal humerus plate  
Plecko M., Kraus A.  
*Operative Orthopadie und Traumatologie* 2005 17:1 (25-50) Cited by: 103  
Embase MEDLINE [Abstract](#) [Index Terms](#) [View Full Text](#) 
- 
- 3 Grammont reversed prosthesis for acute complex fracture of the proximal humerus in an elderly population with 5 to 12 years follow-up  
Cazeneuve J.-F., Cristofari D.-J.  
*Revue de Chirurgie Orthopedique et Reparatrice de l'Appareil Moteur* 2006 92:6 (543-548) Cited by: 69  
Embase MEDLINE [Abstract](#) [Index Terms](#) [View Full Text](#) 
- 
- 4 Retrograde locked nailing of humeral shaft fractures: A prospective study of 58 cases  
Aparé T., Lahogue J.-F., Prové S., Hubert L., Talha A., Cronier P., Massin P.  
*Revue de Chirurgie Orthopedique et Reparatrice de l'Appareil Moteur* 2006 92:1 (19-26) Cited by: 6  
Embase MEDLINE [Abstract](#) [Index Terms](#) [View Full Text](#) 
- 
- 5 Medullary nailing in adult diaphyseal and proximal humeral fractures  
Togninalli D., Remiger A.  
*Swiss Surgery* 1998 4:4 (193-197) Cited by: 13  
Embase MEDLINE [Abstract](#) [Index Terms](#) 
- 
- 6 Internal fixation of proximal humerus fracture by "palm tree" pinning  
Le Bellec Y., Masméjean E., Cottias P., Alnot J.-Y., Hutten D.  
*Revue de Chirurgie Orthopedique et Reparatrice de l'Appareil Moteur* 2002 88:4 (342-348) Cited by: 17  
Embase MEDLINE [Abstract](#) [Index Terms](#) 
- 
- 7 A new internal fixation device for proximal humeral fractures  
Doursounian L., Grimberg J., Cazeau C., Touzard R.-C.  
*Revue de Chirurgie Orthopedique et Reparatrice de l'Appareil Moteur* 1996 82:8 (743-752) Cited by: 22  
Embase MEDLINE [Abstract](#) [Index Terms](#) 
- 
- 8 The interdisciplinary complications-conference - A simple method of quality management  
Heim D., Stricker U., Negri M.  
*Swiss Surgery* 2002 8:6 (243-249) Cited by: 1  
Embase MEDLINE [Abstract](#) [Index Terms](#) [View Full Text](#) 
- 
- 9 Angle-stable intramedullary nailing of proximal humerus fractures with the PHN (Proximal Humeral Nail)  
Blum J., Hansen M., Rommens P.M.  
*Operative Orthopadie und Traumatologie* 2009 21:3 (296-311) Cited by: 17  
Embase MEDLINE [Abstract](#) [Index Terms](#) [View Full Text](#) 
- 
- 10 Management of complications after angularly stable locking proximal humerus plate fixation  
Voigt C., Woltmann A., Partenheimer A., Lill H.  
*Chirurg* 2007 78:1 (40-46)  
MEDLINE [Abstract](#) [Index Terms](#) [View Full Text](#) 
- 
- 11 Results after treatment of instable fractures of the proximal humerus using a fixed-angle plate  
Hessler C., Schmucker U., Matthes G., Ekkernkamp A., Gütschow R., Eggers C.  
*Unfallchirurg* 2006 109:10 (867-874) Cited by: 22  
Embase MEDLINE [Abstract](#) [Index Terms](#) [View Full Text](#) 
- 
- 12 Shoulder arthroplasty for treatment of the sequelae of proximal humerus

- fractures  
Brunner U., Köhler S.  
*Orthopäde* 2007 36:11 (1037-1049) Cited by: 18  
Embase MEDLINE Abstract Index Terms View Full Text 
- 
- 13 The cannulated blade plate 90° for displaced proximal humeral fractures in elderly patients  
Fuchs M., Losch A., Stürmer K.M.  
*Zentralblatt für Chirurgie* 2003 128:1 (22-27) Cited by: 9  
Embase MEDLINE Abstract Index Terms View Full Text 
- 
- 14 Results of shoulder arthroplasty for the treatment of late sequelae of humeral head fractures  
Heitkemper S., Rickert M., Loew M.  
*Aktuelle Traumatologie* 2004 34:3 (117-122) Cited by: 2  
Embase Abstract Index Terms View Full Text 
- 
- 15 Primary endoprosthesis in comminuted fractures of the proximal - Humerus an alternative treatment for elderly patients?  
Hoellen I.P., Bauer G., Holbein O.  
*Zentralblatt für Chirurgie* 1997 122:11 (994-1001) Cited by: 41  
Embase MEDLINE Abstract Index Terms 
- 
- 16 Retrograde intramedullary wire-fixation of proximal humerus fractures in the elderly. Results of a prospectively documented study  
Hoffmann R., Khodadadyan C., Raschke M., Melcher I., Maitino P.D., Haas N.P.  
*Zentralblatt für Chirurgie* 1998 123:11 (1232-1238) Cited by: 11  
Embase MEDLINE Abstract Index Terms 
- 
- 17 Treatment of proximal humeral fractures with the PHILOS angular stable plate. Presentation of 225 cases of dislocated fractures  
Kettler M., Biberthaler P., Braunstein V., Zeiler C., Kroetz M., Mutschler W.  
*Unfallchirurg* 2006 109:12 (1032-1040) Cited by: 107  
Embase MEDLINE Abstract Index Terms View Full Text 
- 
- 18 Osteoporosis is a risk factor for locking-plate implant failure of proximal humerus fractures  
Haasters F., Kindsvater J., Siebenbürger G., Mutschler W., Ockert B.  
*Osteologie* 2014 23:1 (16-21) Cited by: 1  
Embase Abstract Index Terms 
- 
- 19 Humeral shaft fractures in the adult: Introduction  
Lefèvre C.  
*Revue de Chirurgie Orthopedique et Reparatrice de l'Appareil Moteur* 2004 90:5 SUPPL.(1S27-1S31) Cited by: 0  
Embase Abstract Index Terms 
- 
- 20 Intramedullary fixation of humerus shaft fractures. An analysis of complications of 2 implants with special reference to outcome after management with the unreamed humerus interlocking nail  
Vécsei N., Kolonja A., Mousavi M., Vécsei V.  
*Wiener klinische Wochenschrift* 2001 113:15-16 (597-604) Cited by: 4  
MEDLINE Abstract Index Terms 
- 
- 21 Reconstructive surgery following malunion of fractures of the proximal humerus in adults  
Gerber C.  
*Der Orthopäde* 1990 19:6 (316-323) Cited by: 13  
MEDLINE Abstract Index Terms 
- 
- 22 Percutaneous osteosynthesis of humeral head fractures  
Resch H., Hübner C., Aschauer E.  
*Operative Orthopädie und Traumatologie* 2007 19:3 (276-293) Cited by: 6  
Embase MEDLINE Abstract Index Terms View Full Text 

- 23 **Osteoporotic fractures of the proximal humerus**  
Lill H., Ellwein A., Katthagen C., Voigt C.  
*Chirurg* 2012 83:10 (858-865)  
MEDLINE [Abstract](#) [Index Terms](#) [View Full Text](#) 
- 
- 24 **Minimally invasive internal fixation of proximal humeral fractures with a helix wire**  
Laming K.A.  
*Operative Orthopädie und Traumatologie* 2004 16:3 (253-272) Cited by: 0  
Embase [Abstract](#) [Index Terms](#) [View Full Text](#) 
- 
- 25 **Hemiarthroplasty for humeral head fractures**  
Wiedemann E., Brunner U., Hauptmann S., Mutschler W.  
*Operative Orthopädie und Traumatologie* 2004 16:1 (1-27) Cited by: 4  
Embase [Abstract](#) [Index Terms](#) [View Full Text](#) 
- 
- Results** [View](#) | [Print](#) | [Export](#) | [Email](#) | [Order](#) | [Add to Clipboard](#)

Records per page 25

Go to page: of 54 **ELSEVIER**

© 2016 RELX Intellectual Properties SA. All rights reserved.  
Embase, RELX Group and the RE symbol are trade marks of RELX Intellectual Properties SA, used under license.

 RELX Group™

Database(s): **Ovid MEDLINE(R) In-Process & Other Non-Indexed Citations, Ovid MEDLINE(R) Daily and Ovid MEDLINE(R)** 1946 to

Present

Search Strategy:

| #  | Searches                                                                                                                                                                                                                                                                                                                                                                                                                                                                                                                                                                                                                                                                                                                                                                                                                                                                                                                                                                                                                                                                                                                                                                                                                                                                                                                                                                                                                                                                                                                                                                               | Results | Annotations |
|----|----------------------------------------------------------------------------------------------------------------------------------------------------------------------------------------------------------------------------------------------------------------------------------------------------------------------------------------------------------------------------------------------------------------------------------------------------------------------------------------------------------------------------------------------------------------------------------------------------------------------------------------------------------------------------------------------------------------------------------------------------------------------------------------------------------------------------------------------------------------------------------------------------------------------------------------------------------------------------------------------------------------------------------------------------------------------------------------------------------------------------------------------------------------------------------------------------------------------------------------------------------------------------------------------------------------------------------------------------------------------------------------------------------------------------------------------------------------------------------------------------------------------------------------------------------------------------------------|---------|-------------|
| 1  | ((exp Shoulder Fractures/ or exp Humeral Fractures/) and (proximal or periprosth* or peri-implant*).ab,ti.) or (Periprosthetic Fractures/ and (humeral or humerus or shoulder*).ab,ti.) or (((proximal or periprosth* or peri-implant*) adj6 fracture*) and ((humeral or humerus or shoulder) adj9 fracture*)).ab,ti.                                                                                                                                                                                                                                                                                                                                                                                                                                                                                                                                                                                                                                                                                                                                                                                                                                                                                                                                                                                                                                                                                                                                                                                                                                                                  | 2684    |             |
| 2  | exp Arthroplasty, Replacement/ or exp Joint Prosthesis/ or exp Fracture Fixation/ or exp internal fixators/ or Shoulder Joint/su or ((conservative or nonoperative or 'non operative' or nonsurgical or 'non surgical') adj3 (management or therapy or treatment)).ab,ti. or (shoulder adj3 (arthroplast* or replacement* or prosthes* or endoprosthes*).ab,ti. or ((internal or pin or rod or nail) adj3 (fixation or fixator*).ab,ti. or ((bone or closed or intramedullary or medullary) adj3 (nailing or pinning or plating)).ab,ti. or (plate* adj3 (locking or stabilization or stabilization or fixation or osteosynthesis or philos or lphp)).ab,ti. or (surgical adj3 (management or treatment or therapy or approach or technique* or procedure*).ab,ti. or surgery.ab,ti.                                                                                                                                                                                                                                                                                                                                                                                                                                                                                                                                                                                                                                                                                                                                                                                                   | 1230685 |             |
| 3  | 1 and 2                                                                                                                                                                                                                                                                                                                                                                                                                                                                                                                                                                                                                                                                                                                                                                                                                                                                                                                                                                                                                                                                                                                                                                                                                                                                                                                                                                                                                                                                                                                                                                                | 2056    |             |
| 4  | Postoperative Complications/ or exp Arthroplasty/ae or Joint Prosthesis/ae or "Prostheses and Implants"/ae or exp Prosthesis Failure/ or complication*.ab,ti. or (adverse adj3 (effect* or event* or outcome or reaction*).ab,ti. or (postoperative adj3 (complication* or pain or fail* or injur* or fractur*).ab,ti. or ((persistent or movement or shoulder or syndrome) adj3 pain).ab,ti.                                                                                                                                                                                                                                                                                                                                                                                                                                                                                                                                                                                                                                                                                                                                                                                                                                                                                                                                                                                                                                                                                                                                                                                          | 1230816 |             |
| 5  | Hematoma/ or exp Surgical Wound Infection/ or exp Bursitis/ or exp Shoulder Impingement Syndrome/ or Rotator Cuff/in or exp Femur Head Necrosis/ or exp Reoperation/ or Blood Loss, Surgical/ or exp Blood Transfusion/ or Pneumothorax/ or (infection or impingement or "frozen shoulder" or breakage or necrosis or osteonecrosis).ab,ti. or ((screw or wire) adj3 (perforation or cutout or cut-out or loosening or backing or penetration or perforation)).ab,ti. or ("rotator cuff" adj3 (lesion or injury or tendinopath* or disease or disorder* or symptom* or tear)).ab,ti. or ((implant or prosthes* or plate) adj5 (loosen* or tear* or wear or migration or subluxation or luxation or removal or displace* or fail* or dislocat* or instab* or malpositioning or loosening)).tw. or ((wound or implant or prosthetic) adj5 infect*).tw. or (septic adj5 (arthritis or prosthes*).tw. or (osteolysis or impinge* or stiffness or hematoma* or haematoma* or thrombos* or impair* or palsy or palsies or disabilit* or mortality or death or dead or reoperation* or pneumothorax or refracture* or malunion or mal-union or nonunion or non-union or "fracture displacement" or "Scapular notching" or "Heterotopic ossification" or "Post-traumatic osteoarthritis" or "Posttraumatic osteoarthritis").ti,ab. or (blood adj3 (loss or transfusion)).ab,ti. or (fixation adj3 (problem* or loss)).ab,ti. or (tuberosity* adj3 (resorption or dislocation or migration or reduction or displacement)).ab,ti. or "glenoid erosion".ab,ti. or (gleno* adj3 degenerat*).ab,ti. | 3026303 |             |
| 6  | 4 or 5                                                                                                                                                                                                                                                                                                                                                                                                                                                                                                                                                                                                                                                                                                                                                                                                                                                                                                                                                                                                                                                                                                                                                                                                                                                                                                                                                                                                                                                                                                                                                                                 | 3830423 |             |
| 7  | 3 and 6                                                                                                                                                                                                                                                                                                                                                                                                                                                                                                                                                                                                                                                                                                                                                                                                                                                                                                                                                                                                                                                                                                                                                                                                                                                                                                                                                                                                                                                                                                                                                                                | 1410    |             |
| 8  | limit 7 to (english or french or german)                                                                                                                                                                                                                                                                                                                                                                                                                                                                                                                                                                                                                                                                                                                                                                                                                                                                                                                                                                                                                                                                                                                                                                                                                                                                                                                                                                                                                                                                                                                                               | 1302    |             |
| 9  | ("11382420" or "19748802" or "19516088" or "18040648" or "21968245" or "24972435" or "21657970" or "23960366").ui.                                                                                                                                                                                                                                                                                                                                                                                                                                                                                                                                                                                                                                                                                                                                                                                                                                                                                                                                                                                                                                                                                                                                                                                                                                                                                                                                                                                                                                                                     | 8       |             |
| 10 | 8 and 9                                                                                                                                                                                                                                                                                                                                                                                                                                                                                                                                                                                                                                                                                                                                                                                                                                                                                                                                                                                                                                                                                                                                                                                                                                                                                                                                                                                                                                                                                                                                                                                | 8       |             |

1001. **Antegrade interlocking nailing of humeral shaft fractures.**

Petsatodes G; Karataglis D; Papadopoulos P; Christoforides J; Gigis J; Pournaras J.

*Journal of Orthopaedic Science.* 9(3):247-52, 2004.

[Journal Article]

UI: 15168178

**Authors Full Name**

Petsatodes, George; Karataglis, Dimitrios; Papadopoulos, Pericles; Christoforides, John; Gigis, John; Pournaras, John.

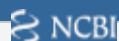

## PubMed Advanced Search Builder

YouTube Tutorial

Use the builder below to create your search

[Edit](#)[Clear](#)

## Builder

All Fields

[Show index list](#)

AND All Fields

[Show index list](#)or [Add to history](#)

## History

[Download history](#) [Clear history](#)

| Search             | Add to builder      | Query                                                                                                                                                                                                                                                                                                                                                                                                                                                                                                                                                                                                                                                                                                                                                                                                                                                                                                                                                                                                                                                                                                                                           | Items found             | Time     |
|--------------------|---------------------|-------------------------------------------------------------------------------------------------------------------------------------------------------------------------------------------------------------------------------------------------------------------------------------------------------------------------------------------------------------------------------------------------------------------------------------------------------------------------------------------------------------------------------------------------------------------------------------------------------------------------------------------------------------------------------------------------------------------------------------------------------------------------------------------------------------------------------------------------------------------------------------------------------------------------------------------------------------------------------------------------------------------------------------------------------------------------------------------------------------------------------------------------|-------------------------|----------|
| <a href="#">#5</a> | <a href="#">Add</a> | Search ((((((proximal[Title/Abstract] OR periprosth*[Title/Abstract] OR peri-implant*[Title/Abstract])) AND (humeral[Title/Abstract] OR humerus[Title/Abstract] OR shoulder[Title/Abstract])) AND fracture*[Title/Abstract])) AND (((inprocess[sb]) OR (publisher[sb] NOT pubstatusnihms NOT pubstatuspmcsd NOT pmcbook)))) AND ((conservative[Title/Abstract] OR nonoperative[Title/Abstract] OR "non operative"[Title/Abstract] OR nonsurgical[Title/Abstract] OR "non surgical"[Title/Abstract] OR arthroplast*[Title/Abstract] OR replacement*[Title/Abstract] OR prosthes*[Title/Abstract] OR endoprosthes*[Title/Abstract] OR pin[Title/Abstract] OR rod[Title/Abstract] OR nail[Title/Abstract] OR fixation[Title/Abstract] OR fixator*[Title/Abstract] OR nailing[Title/Abstract] OR pinning[Title/Abstract] OR plating[Title/Abstract] OR plate*[Title/Abstract] OR locking[Title/Abstract] OR stabilization[Title/Abstract] OR stabilization[Title/Abstract] OR fixation[Title/Abstract] OR osteosynthesis[Title/Abstract] OR philos[Title/Abstract] OR lphp[Title/Abstract] OR surgical[Title/Abstract] OR surgery[Title/Abstract])) | <a href="#">163</a>     | 03:17:02 |
| <a href="#">#4</a> | <a href="#">Add</a> | Search (conservative[Title/Abstract] OR nonoperative[Title/Abstract] OR "non operative"[Title/Abstract] OR nonsurgical[Title/Abstract] OR "non surgical"[Title/Abstract] OR arthroplast*[Title/Abstract] OR replacement*[Title/Abstract] OR prosthes*[Title/Abstract] OR endoprosthes*[Title/Abstract] OR pin[Title/Abstract] OR rod[Title/Abstract] OR nail[Title/Abstract] OR fixation[Title/Abstract] OR fixator*[Title/Abstract] OR nailing[Title/Abstract] OR pinning[Title/Abstract] OR plating[Title/Abstract] OR plate*[Title/Abstract] OR locking[Title/Abstract] OR stabilization[Title/Abstract] OR stabilization[Title/Abstract] OR fixation[Title/Abstract] OR osteosynthesis[Title/Abstract] OR philos[Title/Abstract] OR lphp[Title/Abstract] OR surgical[Title/Abstract] OR surgery[Title/Abstract])                                                                                                                                                                                                                                                                                                                            | <a href="#">2295338</a> | 03:16:23 |
| <a href="#">#3</a> | <a href="#">Add</a> | Search ((((((proximal[Title/Abstract] OR periprosth*[Title/Abstract] OR peri-implant*[Title/Abstract])) AND (humeral[Title/Abstract] OR humerus[Title/Abstract] OR shoulder[Title/Abstract])) AND fracture*[Title/Abstract])) AND (((inprocess[sb]) OR (publisher[sb] NOT pubstatusnihms NOT pubstatuspmcsd NOT pmcbook)))                                                                                                                                                                                                                                                                                                                                                                                                                                                                                                                                                                                                                                                                                                                                                                                                                      | <a href="#">201</a>     | 03:12:00 |
| <a href="#">#2</a> | <a href="#">Add</a> | Search (((proximal[Title/Abstract] OR periprosth*[Title/Abstract] OR peri-implant*[Title/Abstract])) AND (humeral[Title/Abstract] OR humerus[Title/Abstract] OR shoulder[Title/Abstract])) AND fracture*[Title/Abstract]                                                                                                                                                                                                                                                                                                                                                                                                                                                                                                                                                                                                                                                                                                                                                                                                                                                                                                                        | <a href="#">3040</a>    | 03:11:51 |

|                    |                     |                                                                                                                         |                         |          |
|--------------------|---------------------|-------------------------------------------------------------------------------------------------------------------------|-------------------------|----------|
| <a href="#">#1</a> | <a href="#">Add</a> | Search ((inprocess[sb])) OR (publisher[sb] NOT pubstatusnihms NOT pubstatuspmcsd NOT pmcbook) Sort by: <b>Relevance</b> | <a href="#">1088590</a> | 03:11:07 |
|--------------------|---------------------|-------------------------------------------------------------------------------------------------------------------------|-------------------------|----------|

You are here: [NCBI](#) > [Literature](#) > [PubMed](#)[Write to the Help Desk](#)**GETTING STARTED**

[NCBI Education](#)  
[NCBI Help Manual](#)  
[NCBI Handbook](#)  
[Training & Tutorials](#)  
[Submit Data](#)

**RESOURCES**

[Chemicals & Bioassays](#)  
[Data & Software](#)  
[DNA & RNA](#)  
[Domains & Structures](#)  
[Genes & Expression](#)  
[Genetics & Medicine](#)  
[Genomes & Maps](#)  
[Homology](#)  
[Literature](#)  
[Proteins](#)  
[Sequence Analysis](#)  
[Taxonomy](#)  
[Variation](#)

**POPULAR**

[PubMed](#)  
[Bookshelf](#)  
[PubMed Central](#)  
[PubMed Health](#)  
[BLAST](#)  
[Nucleotide](#)  
[Genome](#)  
[SNP](#)  
[Gene](#)  
[Protein](#)  
[PubChem](#)

**FEATURED**

[Genetic Testing Registry](#)  
[PubMed Health](#)  
[GenBank](#)  
[Reference Sequences](#)  
[Gene Expression Omnibus](#)  
[Map Viewer](#)  
[Human Genome](#)  
[Mouse Genome](#)  
[Influenza Virus](#)  
[Primer-BLAST](#)  
[Sequence Read Archive](#)

**NCBI INFORMATION**

[About NCBI](#)  
[Research at NCBI](#)  
[NCBI News](#)  
[NCBI FTP Site](#)  
[NCBI on Facebook](#)  
[NCBI on Twitter](#)  
[NCBI on YouTube](#)

National Center for Biotechnology Information, U.S. National Library of Medicine  
 8600 Rockville Pike, Bethesda MD, 20894 USA

[Policies and Guidelines](#) | [Contact](#)

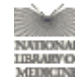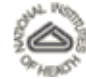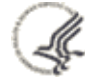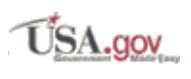



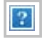

Search

Alerts

Lists

My Scopus

Register now for the free Scopus webinar on July 21st: Learn about what types of APIs Scopus offers and how they can benefit you

Document search | Author search | Affiliation search | **Advanced search**

Browse Sources Compare journals

Search tips Field codes

TITLE-ABS-KEY (complication\* OR (adverse W/3 (effect\* OR event\* OR outcome OR reaction\*)) OR (postoperative W/3 (complication\* OR pain OR fail\* OR injur\* OR fractur\*)) OR ((persistent OR movement OR shoulder OR syndrome) W/3 pain) OR (infection OR impingement OR "frozen shoulder" OR breakage OR necrosis) OR ((screw OR wire) W/3 (perforation OR cutout OR cut-out OR loosening OR backing)) OR ("rotator cuff" W/3 (lesion OR injury OR tendinopath\* OR disease OR disorder\* OR symptom\* OR tear)) OR ((implant OR prosthes\* OR plate) W/5 (loosen\* OR tear\* OR wear OR migration OR subluxation OR luxation OR removal OR displace\* OR fail\* OR dislocat\* OR instab\* OR malpositioning OR loosening)) OR ((wound OR implant OR prosthetic) W/5 infect\*) OR (septic W/5 (arthritis OR prosthes\*)) OR (osteolysis OR impinge\* OR stiffness OR hematoma\* OR haematoma\* OR thrombos\* OR impair\* OR palsy OR palsies OR disability\* OR mortality OR death OR dead OR reoperation\* OR pneumothorax OR refracture\* OR malunion OR mal-union OR nonunion OR non-union OR "fracture displacement" OR "Scapular notching" OR "Heterotopic ossification" OR "Post-traumatic osteoarthritis" OR "Posttraumatic osteoarthritis") OR (blood W/3 (loss OR transfusion)) OR (fixation W/3 (problem\* OR loss)) OR (tuberosity\* W/3 (resorption OR dislocation OR migration OR reduction OR displacement)) OR "glenoid erosion" OR (gleno\* W/3 degenerat\*))

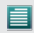

Clear form | Add Author name / Affiliation

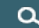

As you type Scopus offers code suggestions. Double click or press "enter" to add to advanced search.

**Operators**

AND  
OR  
AND NOT  
PRE/  
W/

**Codes**

ABS  
AF-ID  
AFFIL  
AFFILCITY  
AFFILCOUNTRY  
AFFILORG  
ALL

**Advanced search examples:**

ALL("heart attack") AND AUTHOR-NAME(smith)  
TITLE-ABS-KEY( \*somatic complaint wom?n ) AND PUBYEAR AFT 1993  
SRCTITLE(\*field ornith\*) AND VOLUME(75) AND ISSUE(1) AND PAGES(53-66)

Search history

Combine queries...

e.g. #1 AND NOT #3.

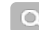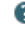

6 (TITLE-ABS-KEY (((proximal OR periprosth\* OR peri-implant\*) W/6 fracture\*) AND (( humeral OR humerus OR shoulder) W/9 fracture\*))) AND (TITLE-ABS-KEY ((( conservative OR nonoperative OR "non operative" OR nonsurgical OR "non surgical") W/3 (management OR therapy OR treatment)) OR (shoulder W/3 (arthroplast\* OR replacement\* OR prosthes\* OR endoprothes\*)) OR ((internal OR pin OR rod OR nail) W/3 (fixation OR fixator\*)) OR ((bone OR closed OR intramedullary OR medullary) W/3 (nailing OR pinning OR plating)) OR (plate\* W/3 (locking OR stabilization OR stabilization OR fixation OR osteosynthesis OR philos OR lphp)) OR (surgical W/3 (management OR treatment OR therapy OR approach OR technique\* OR procedure\*)) OR surgery)) AND (TITLE-ABS-KEY (complication\* OR (adverse W/3 (effect\* OR event\* OR outcome OR reaction\*)) OR (postoperative W/3 (complication\* OR pain OR fail\* OR injur\* OR fractur\*)) OR ((persistent OR movement OR shoulder OR syndrome) W/3 pain) OR (infection OR impingement OR "frozen shoulder" OR breakage OR necrosis) OR ((screw OR wire) W/3 (perforation OR cutout OR cut-out OR loosening OR backing)) OR ("rotator cuff" W/3 (lesion OR injury OR tendinopath\* OR disease OR disorder\* OR symptom\* OR tear)) OR ((implant OR prosthes\* OR plate) W/5 (loosen\* OR tear\* OR wear OR migration OR subluxation OR luxation OR removal OR displace\* OR fail\* OR dislocat\* OR instab\* OR malpositioning OR loosening)) OR ((wound OR implant OR prosthetic) W/5 infect\*) OR (septic W/5 (arthritis OR prosthes\*)) OR (osteolysis OR impinge\* OR stiffness OR hematoma\* OR haematoma\* OR thrombos\* OR impair\* OR palsy OR palsies OR disability\* OR mortality OR death OR dead OR reoperation\* OR pneumothorax OR refracture\* OR malunion OR mal-union OR nonunion OR "fracture displacement" OR "Scapular notching" OR "Heterotopic ossification" OR "Post-traumatic osteoarthritis" OR "Posttraumatic osteoarthritis") OR (blood W/3 (loss OR transfusion)) OR (fixation W/3 (problem\* OR loss)) OR (tuberosity\* W/3 (resorption OR dislocation OR migration OR reduction OR displacement)) OR "glenoid erosion" OR (gleno\* W/3 degenerat\*)) AND (LIMIT-TO (LANGUAGE , "English") OR LIMIT-TO (LANGUAGE , "German") OR LIMIT-TO (LANGUAGE , "French"))

1,576 document results

5 (TITLE-ABS-KEY (((proximal OR periprost\* OR peri-implant\*) W/6 fracture\*) AND ((humeral OR humerus OR shoulder) W/9 fracture\*)) AND (TITLE-ABS-KEY (((conservative OR nonoperative OR "non operative" OR nonsurgical OR "non surgical") W/3 (management OR therapy OR treatment)) OR (shoulder W/3 (arthroplast\* OR replacement\* OR prosthes\* OR endoprosthes\*)) OR ((internal OR pin OR rod OR nail) W/3 (fixation OR fixator\*)) OR ((bone OR closed OR intramedullary OR medullary) W/3 (nailing OR pinning OR plating)) OR (plate\* W/3 (locking OR stabilization OR stabilization OR fixation OR osteosynthesis OR philos OR lphp)) OR (surgical W/3 (management OR treatment OR therapy OR approach OR technique\* OR procedure\*)) OR surgery)) AND (TITLE-ABS-KEY (complication\* OR (adverse W/3 (effect\* OR event\* OR outcome OR reaction\*)) OR (postoperative W/3 (complication\* OR pain OR fail\* OR injur\* OR fractur\*)) OR ((persistent OR movement OR shoulder OR syndrome) W/3 pain) OR (infection OR impingement OR "frozen shoulder" OR breakage OR necrosis) OR ((screw OR wire) W/3 (perforation OR cutout OR cut-out OR loosening OR backing)) OR ("rotator cuff" W/3 (lesion OR injury OR tendinopath\* OR disease OR disorder\* OR symptom\* OR tear)) OR ((implant OR prosthes\* OR plate) W/5 (loosen\* OR tear\* OR wear OR migration OR subluxation OR luxation OR removal OR displace\* OR fail\* OR dislocat\* OR instab\* OR malpositioning OR loosening)) OR ((wound OR implant OR prosthetic) W/5 infect\*) OR (septic W/5 (arthritis OR prosthes\*)) OR (osteolysis OR impinge\* OR stiffness OR hematoma\* OR haematoma\* OR thrombos\* OR impair\* OR palsy OR palsies OR disabilit\* OR mortality OR death OR dead OR reoperation\* OR pneumothorax OR refracture\* OR malunion OR mal-union OR nonunion OR non-union OR "fracture displacement" OR "Scapular notching" OR "Heterotopic ossification" OR "Post-traumatic osteoarthritis" OR "Posttraumatic osteoarthritis") OR (blood W/3 (loss OR transfusion)) OR (fixation W/3 (problem\* OR loss)) OR (tuberosity\* W/3 (resorption OR dislocation OR migration OR reduction OR displacement)) OR "glenoid erosion" OR (gleno\* W/3 degenerat\*))

1,730 document results

4 TITLE-ABS-KEY (complication\* OR (adverse W/3 (effect\* OR event\* OR outcome OR reaction\*)) OR (postoperative W/3 (complication\* OR pain OR fail\* OR injur\* OR fractur\*)) OR ((persistent OR movement OR shoulder OR syndrome) W/3 pain) OR (infection OR impingement OR "frozen shoulder" OR breakage OR necrosis) OR ((screw OR wire) W/3 (perforation OR cutout OR cut-out OR loosening OR backing)) OR ("rotator cuff" W/3 (lesion OR injury OR tendinopath\* OR disease OR disorder\* OR symptom\* OR tear)) OR ((implant OR prosthes\* OR plate) W/5 (loosen\* OR tear\* OR wear OR migration OR subluxation OR luxation OR removal OR displace\* OR fail\* OR dislocat\* OR instab\* OR malpositioning OR loosening)) OR ((wound OR implant OR prosthetic) W/5 infect\*) OR (septic W/5 (arthritis OR prosthes\*)) OR (osteolysis OR impinge\* OR stiffness OR hematoma\* OR haematoma\* OR thrombos\* OR impair\* OR palsy OR palsies OR disabilit\* OR mortality OR death OR dead OR reoperation\* OR pneumothorax OR refracture\* OR malunion OR mal-union OR nonunion OR non-union OR "fracture displacement" OR "Scapular notching" OR "Heterotopic ossification" OR "Post-traumatic osteoarthritis" OR "Posttraumatic osteoarthritis") OR (blood W/3 (loss OR transfusion)) OR (fixation W/3 (problem\* OR loss)) OR (tuberosity\* W/3 (resorption OR dislocation OR migration OR reduction OR displacement)) OR "glenoid erosion" OR (gleno\* W/3 degenerat\*))

7,100,315 document results

3 TITLE-ABS-KEY (((conservative OR nonoperative OR "non operative" OR nonsurgical OR "non surgical") W/3 (management OR therapy OR treatment)) OR (shoulder W/3 (arthroplast\* OR replacement\* OR prosthes\* OR endoprosthes\*)) OR ((internal OR pin OR rod OR nail) W/3 (fixation OR fixator\*)) OR ((bone OR closed OR intramedullary OR medullary) W/3 (nailing OR pinning OR plating)) OR (plate\* W/3 (locking OR stabilization OR stabilization OR fixation OR osteosynthesis OR philos OR lphp)) OR (surgical W/3 (management OR treatment OR therapy OR approach OR technique\* OR procedure\*)) OR surgery)

2,219,224 document results

1 TITLE-ABS-KEY (((proximal OR periprost\* OR peri-implant\*) W/6 fracture\*) AND ((humeral OR humerus OR shoulder) W/9 fracture\*))

3,075 document results

[Top of page ▲](#)
[About Scopus](#)
[What is Scopus](#)
[Content coverage](#)
[Scopus Blog](#)
[Scopus API](#)
[Language](#)
[日本語に切り替える](#)
[切换到简体中文](#)
[切换到繁体中文](#)
[Customer Service](#)
[Help and Contact](#)
[Live Chat](#)

[Terms and Conditions](#)
[Privacy policy](#)

Copyright © 2016 Elsevier B.V. All rights reserved. Scopus® is a registered trademark of Elsevier B.V.

Cookies are set by this site. To decline them or learn more, visit our [Cookies page](#)

RELX Group

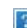

Search Search Manager Medical Terms (MeSH) Browse

To search an exact word(s) use quotation marks, e.g. "hospital" finds hospital; hospital (no quotation marks) finds hospital and hospitals; pay finds paid, pays, paying, payed)

[View fewer lines](#)

- − +  ((proximal or periprosth\* or peri-implant\*) near/6 fracture\*) and ((humeral or humerus or shoulder) near/9 fracture\*):ti,ab,kw (Word variations have been searched) S

---

- − +  ((conservative or nonoperative or 'non operative' or nonsurgical or 'non surgical') near/3 (management or therapy or treatment)) or (shoulder near/3 (arthroplast\* or replacement\* or prosthes\* or endoprosth\*)) or ((internal or pin or rod or nail) near/3 (fixation or fixator\*)) or ((bone or closed or intramedullary or medullary) near/3 (nailing or pinning or plating)) or (plate\* near/3 (locking or stabilization or stabilization or fixation or osteosynthesis or phelos or lphp)) or (surgical near/3 (management or treatment or therapy or approach or technique\* or procedure\*)) or surgery:ti,ab,kw (Word variations have been searched) S

---

- − +  complication\* or (adverse near/3 (effect\* or event\* or outcome or reaction\*)) or (postoperative near/3 (complication\* or pain or fail\* or injur\* or fractur\*)) or ((persistent or movement or shoulder or syndrome) near/3 pain) or (infection or impingement or "frozen shoulder" or breakage or necrosis) or ((screw or wire) near/3 (perforation or cutout or cut-out or loosening or backing)) or ("rotator cuff" near/3 (lesion or injury or tendinopath\* or disease or disorder\* or symptom\* or tear)) or ((implant or prosthes\* or plate) near/5 (loosen\* or tear\* or wear or migration or subluxation or luxation or removal or displace\* or fail\* or dislocat\* or instab\* or malpositioning or loosening)) or ((wound or implant or prosthetic) near/5 infect\*) or (septic near/5 (arthritis or prosthes\*)) or (osteolysis or impinge\* or stiffness or hematoma\* or haematoma\* or thrombos\* or impair\* or palsy or palsies or disabilit\* or mortality or death or dead or reoperation\* or pneumothorax or refracture\* or malunion or mal-union or non-union or "fracture displacement" or "Scapular notching" or "Heterotopic ossification" or "Post-traumatic osteoarthritis" or "Posttraumatic osteoarthritis") or (blood near/3 (loss or transfusion)) or (fixation near/3 (problem\* or loss)) or (tuberosity\* near/3 (resorption or dislocation or migration or reduction or displacement)) or "glenoid erosion" or (gleno\* near/3 degenerat\*):ti,ab,kw (Word variations have been searched) S

---

- − +   TH

---

- − +   M TH

[Search Help](#)

[Highlight orphan lines](#)

Save strategy

Strategy Name

Comments

► Strategy Library (124)

All Results (75)

Cochrane Database of Systematic Reviews : Issue 7 of 12, July 2016

- Cochrane Reviews (1)
  - All
  - Review
  - Protocol

Issue [updated daily](#) throughout month

There is **1** result from **9474** records for your search on **#4 - #1 and #2 and #3** in **Cochrane Reviews** in the strategy currently being edited

- Other Reviews (2)
- Trials (71)
- Methods Studies (0)
- Technology Assessments (0)
- Economic Evaluations (1)
- Cochrane Groups (0)

Sort by Relevance: high to low

[Select all](#) |

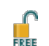

Interventions for treating proximal humeral fractures in adults

Helen HG Handoll and Stig Brorson

Online Publication Date: November 2015

[Ns](#) [Cc](#) [Review](#)

All  
Current Issue

- Me Methodology
- Dx Diagnostic
- Ov Overview

- [Pg](#) Prognosis
- [Qu](#) Qualitative
- [Cc](#) Conclusions changed
- [Ns](#) New search
- [Mc](#) Major change
- [Up](#) Update
- [Wd](#) Withdrawn
- [Cm](#) Comment

**Wiley Online Library**

**Publications**

[About us](#)

**Browse By Subject**

[Help](#)

[Contact Us](#)

**Resources**

[Agents](#)

[Advertisers](#)

[Media](#)

[Privacy](#)

[Cookies](#)

[Terms & Conditions](#)

[Site Map](#)

**Search Results for *Proximal Humerus Fractures* – update 2017/07/07**  
**Search protocols:**

-  Advanced search - PubMed - NCBI.pdf
-  Cochrane Library.pdf
-  Exported HTML \_ Embase.pdf
-  Medline.pdf
-  Scopus - Advanced search.pdf

|                 | References | References after Deduplication |
|-----------------|------------|--------------------------------|
| <b>EMBASE</b>   | 198        | 133                            |
| <b>Medline</b>  | 92         | 87                             |
| <b>PubMed</b>   | 186        | 106                            |
| <b>Scopus</b>   | 149        | 35                             |
| <b>Cochrane</b> | 29*        | 17                             |
| <b>Pool</b>     | 654        | 378                            |

**Reference files:** Proximal\_humerus\_fractures\_update.enlx

Cochrane: neue Treffer durch Deduplizierung mit ursprünglicher Cochrane-Suche, (siehe Screenshots Seite 2)

before deduplication:

| My Library                                                                                         |       |
|----------------------------------------------------------------------------------------------------|-------|
|  All References | (654) |
|  Unfiled        | (0)   |
|  Trash          | (0)   |
| <b>My Groups</b>                                                                                   |       |
|  Cochrane       | (29)  |
|  EMBASE         | (198) |
|  Medline        | (92)  |
|  PubMed         | (186) |
|  Scopus         | (149) |

after:

| My Library                                                                                         |       |
|----------------------------------------------------------------------------------------------------|-------|
|  All References | (378) |
|  Unfiled        | (0)   |
|  Trash          | (276) |
| <b>My Groups</b>                                                                                   |       |
|  Cochrane       | (17)  |
|  EMBASE         | (133) |
|  Medline        | (87)  |
|  PubMed         | (106) |
|  Scopus         | (35)  |

Cochrane  
before:

| My Library        |       |
|-------------------|-------|
| All References    | (187) |
| Copied References | (75)  |
| Unfiled           | (187) |
| Trash             | (0)   |
| <b>My Groups</b>  |       |
| search 2016       | (75)  |
| search 2017       | (112) |

after

| My Library           |       |
|----------------------|-------|
| All References       | (29)  |
| Copied References    | (0)   |
| Duplicate References | (2)   |
| Unfiled              | (29)  |
| Trash                | (158) |
| <b>My Groups</b>     |       |
| search 2016          | (0)   |
| search 2017          | (29)  |

## Embase Session Results (7 Jul 2017)

| No. | Query                                                                                                                                                                                                                                                                                                                                                                                                                                                                                                                                                                                                                                                                                                                                                                                                                                                                                                                                                                                                                                                                                                                                                                                                                                                                                                                                                                                                                                                                                                                                                                                                                                                                                                                                                                                                                                                         | Results |
|-----|---------------------------------------------------------------------------------------------------------------------------------------------------------------------------------------------------------------------------------------------------------------------------------------------------------------------------------------------------------------------------------------------------------------------------------------------------------------------------------------------------------------------------------------------------------------------------------------------------------------------------------------------------------------------------------------------------------------------------------------------------------------------------------------------------------------------------------------------------------------------------------------------------------------------------------------------------------------------------------------------------------------------------------------------------------------------------------------------------------------------------------------------------------------------------------------------------------------------------------------------------------------------------------------------------------------------------------------------------------------------------------------------------------------------------------------------------------------------------------------------------------------------------------------------------------------------------------------------------------------------------------------------------------------------------------------------------------------------------------------------------------------------------------------------------------------------------------------------------------------|---------|
| #9  | #3 AND #6 NOT [conference abstract]/lim AND ([english]/lim OR [french]/lim OR [german]/lim) AND [18-7-2016]/sd NOT [7-7-2017]/sd                                                                                                                                                                                                                                                                                                                                                                                                                                                                                                                                                                                                                                                                                                                                                                                                                                                                                                                                                                                                                                                                                                                                                                                                                                                                                                                                                                                                                                                                                                                                                                                                                                                                                                                              | 198     |
| #8  | #3 AND #6 NOT [conference abstract]/lim AND ([english]/lim OR [french]/lim OR [german]/lim)                                                                                                                                                                                                                                                                                                                                                                                                                                                                                                                                                                                                                                                                                                                                                                                                                                                                                                                                                                                                                                                                                                                                                                                                                                                                                                                                                                                                                                                                                                                                                                                                                                                                                                                                                                   | 1540    |
| #7  | #3 AND #6                                                                                                                                                                                                                                                                                                                                                                                                                                                                                                                                                                                                                                                                                                                                                                                                                                                                                                                                                                                                                                                                                                                                                                                                                                                                                                                                                                                                                                                                                                                                                                                                                                                                                                                                                                                                                                                     | 1806    |
| #6  | #4 OR #5                                                                                                                                                                                                                                                                                                                                                                                                                                                                                                                                                                                                                                                                                                                                                                                                                                                                                                                                                                                                                                                                                                                                                                                                                                                                                                                                                                                                                                                                                                                                                                                                                                                                                                                                                                                                                                                      | 5481468 |
| #5  | 'hematoma'/exp OR 'infection rate'/exp OR 'frozen shoulder'/exp OR 'shoulder impingement syndrome'/exp OR 'rotator cuff injury'/exp OR 'neurological complication'/exp OR 'femur head necrosis'/exp OR 'screw loosening'/exp OR 'reoperation'/exp OR 'operative blood loss'/exp OR 'postoperative hemorrhage'/exp OR 'blood transfusion'/exp OR 'pneumothorax'/exp OR infection:ab,ti OR impingement:ab,ti OR 'frozen shoulder':ab,ti OR breakage:ab,ti OR necrosis:ab,ti OR ((screw OR wire) NEAR/3 (perforation OR cutout OR 'cut out' OR loosening OR backing)):ab,ti OR ('rotator cuff' NEAR/3 (lesion OR injury OR tendinopath* OR disease OR disorder* OR symptom* OR tear)):ab,ti OR ((implant OR prosthesis* OR plate) NEAR/5 (loosen* OR tear* OR wear OR migration OR subluxation OR luxation OR removal OR displace* OR fail* OR dislocat* OR instab* OR malpositioning OR loosening)):ab,ti OR ((wound OR implant OR prosthetic) NEAR/5 infect*):ab,ti OR (septic NEAR/5 (arthritis OR prosthes*)):ab,ti OR osteolysis:ab,ti OR impinge*:ab,ti OR stiffness:ab,ti OR hematoma*:ab,ti OR haematoma*:ab,ti OR thrombos*:ab,ti OR impair*:ab,ti OR palsy:ab,ti OR palsies:ab,ti OR disabilit*:ab,ti OR mortality:ab,ti OR death:ab,ti OR dead:ab,ti OR reoperation*:ab,ti OR pneumothorax:ab,ti OR refracture*:ab,ti OR malunion:ab,ti OR 'mal union':ab,ti OR nonunion:ab,ti OR 'non union':ab,ti OR 'fracture displacement':ab,ti OR 'scapular notching':ab,ti OR 'heterotopic ossification':ab,ti OR 'post-traumatic osteoarthritis':ab,ti OR 'posttraumatic osteoarthritis':ab,ti OR (blood NEAR/3 (loss OR transfusion)):ab,ti OR (fixation NEAR/3 (problem* OR loss)):ab,ti OR (tuberosity* NEAR/3 (resorption OR dislocation OR migration OR reduction OR displacement)):ab,ti OR 'glenoid erosion':ab,ti OR (gleno* NEAR/3 degenerat*):ab,ti | 4214539 |
| #4  | 'adverse outcome'/exp OR 'treatment failure'/exp OR 'postoperative complication'/exp OR complication*:ab,ti OR (adverse NEAR/3 (effect* OR event* OR outcome OR reaction*)):ab,ti OR (postoperative NEAR/3 (complication* OR pain OR fail* OR injur* OR fractur*)):ab,ti OR ((persistent OR movement OR shoulder OR syndrome) NEAR/3 pain):ab,ti                                                                                                                                                                                                                                                                                                                                                                                                                                                                                                                                                                                                                                                                                                                                                                                                                                                                                                                                                                                                                                                                                                                                                                                                                                                                                                                                                                                                                                                                                                              | 1990060 |
| #3  | #1 AND #2                                                                                                                                                                                                                                                                                                                                                                                                                                                                                                                                                                                                                                                                                                                                                                                                                                                                                                                                                                                                                                                                                                                                                                                                                                                                                                                                                                                                                                                                                                                                                                                                                                                                                                                                                                                                                                                     | 2517    |
| #2  | 'shoulder arthroplasty'/exp OR 'shoulder prosthesis'/exp OR 'conservative treatment'/exp OR 'internal fixator'/exp OR 'intramedullary nailing'/exp OR 'plate fixation'/exp OR 'bone screw'/exp OR ((conservative OR nonoperative OR 'non operative' OR nonsurgical OR 'non surgical') NEAR/3 (management OR therapy OR treatment)):ab,ti OR (shoulder NEAR/3 (arthroplast* OR replacement* OR prosthesis* OR endoprosthesis*)):ab,ti OR ((internal OR pin OR rod OR nail) NEAR/3 (fixation OR fixator*)):ab,ti OR ((bone OR closed OR intramedullary OR medullary) NEAR/3 (nailing OR pinning OR plating)):ab,ti OR (plate* NEAR/3 (locking OR stabilization OR stabilization OR fixation OR osteosynthesis OR philos OR lphp)):ab,ti OR (surgical NEAR/3 (management OR treatment OR therapy OR approach OR technique* OR procedure*)):ab,ti OR surgery:ab,ti                                                                                                                                                                                                                                                                                                                                                                                                                                                                                                                                                                                                                                                                                                                                                                                                                                                                                                                                                                                                | 2066166 |
| #1  | 'proximal humerus fracture'/exp OR ('shoulder fracture'/exp OR 'humerus fracture'/exp AND (proximal:ab,ti OR periprost*:ab,ti OR 'peri implant*':ab,ti)) OR ('periprosthetic fracture'/exp AND (humeral:ab,ti OR humerus:ab,ti OR shoulder*:ab,ti)) OR (((proximal OR periprost* OR 'peri implant*') NEAR/6 fracture*):ab,ti AND ((humeral OR humerus OR shoulder) NEAR/9 fracture*):ab,ti)                                                                                                                                                                                                                                                                                                                                                                                                                                                                                                                                                                                                                                                                                                                                                                                                                                                                                                                                                                                                                                                                                                                                                                                                                                                                                                                                                                                                                                                                   | 3658    |

Database(s): **Ovid MEDLINE(R) In-Process & Other Non-Indexed Citations, Ovid MEDLINE(R) Daily and Ovid MEDLINE(R)** 1946 to Present

Search Strategy:

| #  | Searches                                                                                                                                                                                                                                                                                                                                                                                                                                                                                                                                                                                                                                                                                                                                                                                                                                                                                                                                                                                                                                                                                                                                                                                                                                                                                                                                                                                                                                                                                                                                                                              | Results |
|----|---------------------------------------------------------------------------------------------------------------------------------------------------------------------------------------------------------------------------------------------------------------------------------------------------------------------------------------------------------------------------------------------------------------------------------------------------------------------------------------------------------------------------------------------------------------------------------------------------------------------------------------------------------------------------------------------------------------------------------------------------------------------------------------------------------------------------------------------------------------------------------------------------------------------------------------------------------------------------------------------------------------------------------------------------------------------------------------------------------------------------------------------------------------------------------------------------------------------------------------------------------------------------------------------------------------------------------------------------------------------------------------------------------------------------------------------------------------------------------------------------------------------------------------------------------------------------------------|---------|
| 1  | ((exp Shoulder Fractures/ or exp Humeral Fractures/) and (proximal or periprost* or peri-implant*).ab,ti.) or (Periprosthetic Fractures/ and (humeral or humerus or shoulder*).ab,ti.) or (((proximal or periprost* or periimplant*) adj6 fracture*) and ((humeral or humerus or shoulder) adj9 fracture*)).ab,ti.                                                                                                                                                                                                                                                                                                                                                                                                                                                                                                                                                                                                                                                                                                                                                                                                                                                                                                                                                                                                                                                                                                                                                                                                                                                                    | 2892    |
| 2  | exp Arthroplasty, Replacement/ or exp Joint Prosthesis/ or exp Fracture Fixation/ or exp internal fixators/ or Shoulder Joint/su or ((conservative or nonoperative or 'non operative' or nonsurgical or 'non surgical') adj3 (management or therapy or treatment)).ab,ti. or (shoulder adj3 (arthroplast* or replacement* or prosthes* or endoprothes*).ab,ti. or ((internal or pin or rod or nail) adj3 (fixation or fixator*).ab,ti. or ((bone or closed or intramedullary or medullary) adj3 (nailing or pinning or plating)).ab,ti. or (plate* adj3 (locking or stabilization or stabilization or fixation or osteosynthesis or philos or lphp)).ab,ti. or (surgical adj3 (management or treatment or therapy or approach or technique* or procedure*).ab,ti. or surgery.ab,ti.                                                                                                                                                                                                                                                                                                                                                                                                                                                                                                                                                                                                                                                                                                                                                                                                   | 1319214 |
| 3  | 1 and 2                                                                                                                                                                                                                                                                                                                                                                                                                                                                                                                                                                                                                                                                                                                                                                                                                                                                                                                                                                                                                                                                                                                                                                                                                                                                                                                                                                                                                                                                                                                                                                               | 2220    |
| 4  | Postoperative Complications/ or exp Arthroplasty/ae or Joint Prosthesis/ae or "Prostheses and Implants"/ae or exp Prosthesis Failure/ or complication*.ab,ti. or (adverse adj3 (effect* or event* or outcome or reaction*)).ab,ti. or (postoperative adj3 (complication* or pain or fail* or injur* or fractur*).ab,ti. or ((persistent or movement or shoulder or syndrome) adj3 pain).ab,ti.                                                                                                                                                                                                                                                                                                                                                                                                                                                                                                                                                                                                                                                                                                                                                                                                                                                                                                                                                                                                                                                                                                                                                                                        | 1332967 |
| 5  | Hematoma/ or exp Surgical Wound Infection/ or exp Bursitis/ or exp Shoulder Impingement Syndrome/ or Rotator Cuff/in or exp Femur Head Necrosis/ or exp Reoperation/ or Blood Loss, Surgical/ or exp Blood Transfusion/ or Pneumothorax/ or (infection or impingement or "frozen shoulder" or breakage or necrosis or osteonecrosis).ab,ti. or ((screw or wire) adj3 (perforation or cutout or cut-out or loosening or backing or penetration or perforation)).ab,ti. or ("rotator cuff" adj3 (lesion or injury or tendinopath* or disease or disorder* or symptom* or tear).ab,ti. or ((implant or prosthes* or plate) adj5 (loosen* or tear* or wear or migration or subluxation or luxation or removal or displace* or fail* or dislocat* or instab* or malpositioning or loosening)).tw. or ((wound or implant or prosthetic) adj5 infect*).tw. or (septic adj5 (arthritis or prosthes*).tw. or (osteolysis or impinge* or stiffness or hematoma* or haematoma* or thrombos* or impair* or palsy or palsies or disabilit* or mortality or death or dead or reoperation* or pneumothorax or refracture* or malunion or mal-union or nonunion or non-union or "fracture displacement" or "Scapular notching" or "Heterotopic ossification" or "Post-traumatic osteoarthritis" or "Posttraumatic osteoarthritis").ti,ab. or (blood adj3 (loss or transfusion)).ab,ti. or (fixation adj3 (problem* or loss)).ab,ti. or (tuberosity* adj3 (resorption or dislocation or migration or reduction or displacement)).ab,ti. or "glenoid erosion".ab,ti. or (gleno* adj3 degenerat*).ab,ti. | 3259680 |
| 6  | 4 or 5                                                                                                                                                                                                                                                                                                                                                                                                                                                                                                                                                                                                                                                                                                                                                                                                                                                                                                                                                                                                                                                                                                                                                                                                                                                                                                                                                                                                                                                                                                                                                                                | 4129312 |
| 7  | 3 and 6                                                                                                                                                                                                                                                                                                                                                                                                                                                                                                                                                                                                                                                                                                                                                                                                                                                                                                                                                                                                                                                                                                                                                                                                                                                                                                                                                                                                                                                                                                                                                                               | 1517    |
| 8  | limit 7 to (english or french or german)                                                                                                                                                                                                                                                                                                                                                                                                                                                                                                                                                                                                                                                                                                                                                                                                                                                                                                                                                                                                                                                                                                                                                                                                                                                                                                                                                                                                                                                                                                                                              | 1400    |
| 9  | (2016 07* or 2016 08* or 2016 09* or 2016 10* or 2016 11* or 2016 12* or 2017*).dt.                                                                                                                                                                                                                                                                                                                                                                                                                                                                                                                                                                                                                                                                                                                                                                                                                                                                                                                                                                                                                                                                                                                                                                                                                                                                                                                                                                                                                                                                                                   | 985507  |
| 10 | 8 and 9                                                                                                                                                                                                                                                                                                                                                                                                                                                                                                                                                                                                                                                                                                                                                                                                                                                                                                                                                                                                                                                                                                                                                                                                                                                                                                                                                                                                                                                                                                                                                                               | 92      |

1. Transhumeral Anterior Radial Nerve Transposition to Simplify Anticipated Future **Humeral** Reconstruction. [Review]

Muzykewicz DA; Abrams RA.

*Journal of Hand Surgery - American Volume. 42(7):578.e1-578.e5, 2017 Jul.**[Journal Article. Review]*

UI: 28526166

**Authors Full Name**

Muzykewicz, David A; Abrams, Reid A.



## PubMed Advanced Search Builder

YouTube Tutorial

Use the builder below to create your search

[Edit](#)

[Clear](#)

### Builder

All Fields - [Show index list](#)

AND All Fields - + [Show index list](#)

or [Add to history](#)

### History

[Download history](#) [Clear history](#)

| Search             | Add to builder      | Query                                                                                                                                                                                                                                                                                                                                                                                                                                                                                                                                                                                                                                                                                                                                                                                                                                                                                                                                                                                                                                                                                                                                           | Items found         | Time     |
|--------------------|---------------------|-------------------------------------------------------------------------------------------------------------------------------------------------------------------------------------------------------------------------------------------------------------------------------------------------------------------------------------------------------------------------------------------------------------------------------------------------------------------------------------------------------------------------------------------------------------------------------------------------------------------------------------------------------------------------------------------------------------------------------------------------------------------------------------------------------------------------------------------------------------------------------------------------------------------------------------------------------------------------------------------------------------------------------------------------------------------------------------------------------------------------------------------------|---------------------|----------|
| <a href="#">#2</a> | <a href="#">Add</a> | Search ((((((proximal[Title/Abstract] OR periprost*[Title/Abstract] OR periimplant*[ Title/Abstract])) AND (humeral[Title/Abstract] OR humerus[Title/Abstract] OR shoulder[Title/Abstract])) AND fracture*[Title/Abstract])) AND (((inprocess[sb])) OR (publisher[sb] NOT pubstatusnihms NOT pubstatuspmcsd NOT pmcbook)))) AND ((conservative[Title/Abstract] OR nonoperative[Title/Abstract] OR "non operative"[Title/Abstract] OR nonsurgical[Title/Abstract] OR "non surgical" [Title/Abstract] OR arthroplast*[Title/Abstract] OR replacement*[Title/Abstract] OR prosthes*[Title/Abstract] OR endoprothes*[Title/Abstract] OR pin[Title/Abstract] OR rod[Title/Abstract] OR nail[Title/Abstract] OR fixation[Title/Abstract] OR fixator*[Title/Abstract] OR nailing[Title/Abstract] OR pinning[Title/Abstract] OR plating[Title/Abstract] OR plate*[Title/Abstract] OR locking[Title/Abstract] OR stabilization[Title/Abstract] OR stabilization[Title/Abstract] OR fixation[Title/Abstract] OR osteosynthesis[Title/Abstract] OR philos[Title/Abstract] OR lphp[Title/Abstract] OR surgical[Title/Abstract] OR surgery[Title/Abstract])) | <a href="#">186</a> | 03:55:03 |

You are here: [NCBI](#) > [Literature](#) > [PubMed](#)

[Support Center](#)

#### GETTING STARTED

- [NCBI Education](#)
- [NCBI Help Manual](#)
- [NCBI Handbook](#)
- [Training & Tutorials](#)
- [Submit Data](#)

#### RESOURCES

- [Chemicals & Bioassays](#)
- [Data & Software](#)
- [DNA & RNA](#)
- [Domains & Structures](#)
- [Genes & Expression](#)
- [Genetics & Medicine](#)
- [Genomes & Maps](#)
- [Homology](#)
- [Literature](#)
- [Proteins](#)

#### POPULAR

- [PubMed](#)
- [Bookshelf](#)
- [PubMed Central](#)
- [PubMed Health](#)
- [BLAST](#)
- [Nucleotide](#)
- [Genome](#)
- [SNP](#)
- [Gene](#)
- [Protein](#)

#### FEATURED

- [Genetic Testing Registry](#)
- [PubMed Health](#)
- [GenBank](#)
- [Reference Sequences](#)
- [Gene Expression Omnibus](#)
- [Map Viewer](#)
- [Human Genome](#)
- [Mouse Genome](#)
- [Influenza Virus](#)
- [Primer-BLAST](#)

#### NCBI INFORMATION

- [About NCBI](#)
- [Research at NCBI](#)
- [NCBI News & Blog](#)
- [NCBI FTP Site](#)
- [NCBI on Facebook](#)
- [NCBI on Twitter](#)
- [NCBI on YouTube](#)

# Advanced search

[Compare sources](#)[Documents](#)[Authors](#)[Affiliations](#)[Advanced](#)[Search tips](#)[Enter query string](#)

(TITLE-ABS-KEY( ((proximal OR periprosth\*) W/6 fracture\*) AND ((humeral OR humerus OR shoulder) W/9 fracture\*)) OR TITLE-ABS-KEY( ((peri-implant\*) W/6 fracture\*) AND ((humeral OR humerus OR shoulder) W/9 fracture\*)) AND (TITLE-ABS-KEY (((conservative OR nonoperative OR "non operative" OR nonsurgical OR "non surgical") W/3 (management OR therapy OR treatment)) OR (shoulder W/3 (arthroplast\* OR replacement\* OR prosthes\* OR endoprosthesis\*)) OR ((internal OR pin OR rod OR nail) W/3 (fixation OR fixator\*)) OR ((bone OR closed OR intramedullary OR medullary) W/3 (nailing OR pinning OR plating)) OR (plate\* W/3 (locking OR stabilization OR stabilization OR fixation OR osteosynthesis OR philos OR lphp)) OR (surgical W/3 (management OR treatment OR therapy OR approach OR technique\* OR procedure\*)) OR surgery)) AND (TITLE-ABS-KEY (complication\* OR (adverse W/3 (effect\* OR event\* OR outcome OR reaction\*)) OR (postoperative W/3 (complication\* or pain or fail\* or injur\* or fractur\*)) OR ((persistent OR movement OR shoulder OR syndrome) W/3 pain) OR (infection OR impingement OR "frozen shoulder" OR breakage OR necrosis) OR ((screw OR wire) W/3 (perforation OR cutout OR cut-out OR loosening OR backing)) OR ("rotator cuff" W/3 (lesion OR injury OR tendinopath\* OR disease OR disorder\* OR symptom\* OR tear)) OR ((implant or prosthes\* OR plate) W/5 (loosen\* or tear\* or wear or migration or subluxation or luxation or removal or displace\* or fail\* or dislocat\* or instab\* OR malpositioning OR loosening)) OR ((wound or

## Operators

|         |   |
|---------|---|
| AND     | + |
| OR      | + |
| AND NOT | + |
| PRE/    | + |
| W/      | + |

## Field codes

|       |   |
|-------|---|
| ABS   | + |
| AF-ID | + |
| AFFIL | + |

implant or prosthetic) W/5 infect\*) OR (septic W/5 (arthritis or prosthes\*)) OR (osteolysis or impinge\* or stiffness or hematoma\* or haematoma\* or thrombos\* or impair\* or palsy or palsies OR disabilit\* or mortality OR death OR dead OR reoperation\* OR pneumothorax OR refracture\* OR malunion OR mal-union OR nonunion OR non-union OR "fracture displacement" OR "Scapular notching" OR "Heterotopic ossification" OR "Post-traumatic osteoarthritis" OR "Posttraumatic osteoarthritis") OR (blood W/3 (loss or transfusion)) OR (fixation W/3 (problem\* OR loss)) OR (tuberosity\* W/3 (resorption OR dislocation OR migration OR reduction OR displacement)) OR "glenoid erosion" OR (gleno\* W/3 degenerat\*)) AND ( LIMIT-TO ( LANGUAGE,"English" ) OR LIMIT-TO ( LANGUAGE,"German" ) OR LIMIT-TO ( LANGUAGE,"French" ) ) AND ORIG-LOAD-DATE > 20160718

ALL("heart attack") AND AUTHOR-NAME(smith)

TITLE-ABS-KEY(\*somatic complaint wom?n) AND PUBYEAR AFT 1993

SRCTITLE(\*field ornith\*) AND VOLUME(75) AND ISSUE(1) AND PAGES(53-66)

Add Author name / Affiliation Clear form

|              |   |
|--------------|---|
| AFFILCITY    | + |
| AFFILCOUNTRY | + |
| AFFILORG     | + |
| ALL          | + |
| ARTNUM       | + |
| AU-ID        | + |
| AUTH         | + |

Operators and field codes can be added by typing it in the query field, clicking on the "+" icon or by clicking on the "add" button in the example pop out.

## Search history

Combine queries...

e.g. #1 AND NOT #3

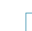

- 6 ( TITLE-ABS-KEY ( ( ( proximal OR periprosth\* ) W/6 fracture\* ) AND ( ( humeral OR humerus OR shoulder ) W/9 fracture\* ) ) OR TITLE-ABS-KEY ( ( ( peri-implant\* ) W/6 fracture\* ) AND ( ( humeral OR humerus OR shoulder ) W/9 fracture\* ) ) ) AND ( TITLE-ABS-KEY ( ( ( conservative OR nonoperative OR "non operative" OR nonsurgical OR "non surgical" ) W/3 ( management OR therapy C... View More  )
- 5 ( TITLE-ABS-KEY ( ( ( proximal OR periprosth\* ) W/6 fracture\* ) AND ( ( humeral OR humerus OR shoulder ) W/9 fracture\* ) ) OR TITLE-ABS-KEY ( ( ( peri-implant\* ) W/6 fracture\* ) AND ( ( humeral OR humerus OR shoulder ) W/9 fracture\* ) ) ) AND ( TITLE-ABS-KEY ( ( ( conservative OR nonoperative OR "non operative" OR nonsurgical OR "non surgical" ) W/3 ( management OR therapy C... View More  )
- 4 ( TITLE-ABS-KEY ( ( ( proximal OR periprosth\* ) W/6 fracture\* ) AND ( ( humeral OR humerus OR shoulder ) W/9 fracture\* ) ) OR TITLE-ABS-KEY ( ( ( peri-implant\* ) W/6 fracture\* ) AND ( ( humeral OR humerus OR shoulder ) W/9 fracture\* ) ) ) AND

149 document results

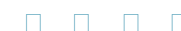

1,752 document results

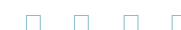

1,915 document results

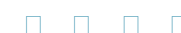

( TITLE-ABS-KEY ( ( ( conservative OR nonoperative OR "non operative" OR nonsurgical OR "non surgical" ) W/3 ( management OR therapy C... [View More](#)

3 TITLE-ABS-KEY ( complication\* OR ( adverse W/3 ( effect\* OR event\* OR outcome OR reaction\* ) ) OR ( postoperative W/3 ( complication\* OR pain OR fail\* OR injur\* OR fractur\* ) ) OR ( ( persistent OR movement OR shoulder OR syndrome ) W/3 pain ) OR ( infection OR impingement OR "frozen shoulder" OR breakage OR necrosis ) OR ( ( screw OR wire ) W/3 ( perforation OR cutou... [View More](#)

7,574,872 document results

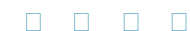

2 TITLE-ABS-KEY ( ( ( conservative OR nonoperative OR "non operative" OR nonsurgical OR "non surgical" ) W/3 ( management OR therapy OR treatment ) ) OR ( shoulder W/3 ( arthroplast\* OR replacement\* OR prosthes\* OR endoprothes\* ) ) OR ( ( internal OR pin OR rod OR nail ) W/3 ( fixation OR fixator\* ) ) OR ( ( bone OR closed OR intramedullary OR medulla... [View More](#)

2,345,621 document results

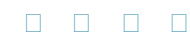

Showing 5 most recent searches | [View all 6](#)

[Top of page](#)

Brought to you by

[UZH Hauptbibliothek /  
Zentralbibliothek Zürich](#)

## About Scopus

[What is Scopus](#)  
[Content coverage](#)  
[Scopus blog](#)  
[Scopus API](#)  
[Privacy matters](#)

## Language

[日本語に切り替える](#)  
[切换到简体中文](#)  
[切换到繁體中文](#)  
[Русский язык](#)

## Customer Service

[Help](#)  
[Contact us](#)

Search

Search Manager

Medical Terms (MeSH)

Browse

To search an exact word(s) use quotation marks, e.g. "hospital" finds hospital; hospital (no quotation marks) finds hospital and hospitals; pay finds paid, pays, paying, payed)

[View fewer lines](#) 

#1   185

#2   126732

#3   450446

#4   112

#5   31  
 Publication Year from 2016 to 2017

#6    N/A

[Search Help](#)

[Highlight orphan lines](#)

Save strategy

Strategy Name

Comments

## ► Strategy Library (131)

All Results (112)

NHS Economic Evaluation Database : Issue 2 of 4, April 2015

Cochrane Reviews (5)

There is **1** result from **17433** records for your search on **#4 - #1 and #2 and #3** in **Economic Evaluations** in the strategy currently being edited

All

Review

Protocol

Sort by Relevance: high to low

Other Reviews (4)

[Select all](#) |

Trials (102)

Methods Studies (0)

Technology Assessments (0)

Economic Evaluations (1)

Cochrane Groups (0)

[Functional results of angular-stable plate fixation in displaced proximal humeral fractures](#) (Provisional abstract)

Centre for Reviews and Dissemination

Original Author(s): Handschin A E , Cardell M , Contaldo C , Trentz O and Wanner G A

Injury, 2008, 39, 306-313

- Me Methodology
- Dx Diagnostic
- Ov Overview
- Pg Prognosis
- Qu Qualitative
- Cc Conclusions changed
- Ns New search
- Mc Major change
- Up Update
- Wd Withdrawn
- Cm Comment

Wiley Online Library

Publications

Browse By Subject

Resources

[About us](#)[Help](#)[Contact Us](#)[Agents](#)[Advertisers](#)[Media](#)[Privacy](#)[Cookies](#)[Terms & Conditions](#)[Site Map](#)

Copyright © 1999–2017 John Wiley &amp; Sons, Inc. All Rights Reserved.

[About Wiley](#)[Wiley.com](#)[Wiley Job Network](#)

WILEY
