# Supplementary material for: Complications after surgical management of proximal humeral fractures: a systematic review of event terms and definitions
Source: Springer Nature journal article supplement (doi:10.1186/s12891-020-03353-8), 2020-05-26
Supplement: MOESM3 [file 18015986]

### Supplementary file 3

**Article title** Complications after surgical management of proximal humeral fractures: a systematic review of event terms and definitions  
**Journal name** BMC Musculoskeletal Disorders  
**Author names** Alispahic N, Brorson S, Bahrs C, Joeris A, Steinitz A, Audigé L  
**Corresponding author e-mail address** Laurent Audigé, Schulthess Klinik, CH-8008 Zurich, Switzerland  
 laurent.audige@kws.ch

#### Extracted unfavorable event terms

| Event group and specification terms        | Language | Extracted event terms                    | Non-surgical | Plating | Nailing | Arthroplasty | Other surgical | Number of references |
|--------------------------------------------|----------|------------------------------------------|--------------|---------|---------|--------------|----------------|----------------------|
| <b>LOCAL EVENTS</b>                        |          |                                          |              |         |         |              |                |                      |
| <b>1- Implant events</b>                   |          |                                          |              |         |         |              |                |                      |
| <b>Migration (subsidence, tilt, shift)</b> |          |                                          |              |         |         |              |                |                      |
| Wire and Pin                               |          |                                          |              |         |         |              |                |                      |
|                                            | en       | wire migration                           | -            | -       | -       | -            | X              | 1                    |
|                                            | en       | migration of kirschner-wire              | -            | -       | -       | -            | X              | 1                    |
|                                            | en       | migration of k-wires                     | -            | -       | -       | -            | X              | 2                    |
|                                            | en       | k-wire migration                         | -            | -       | -       | -            | X              | 1                    |
|                                            | en       | pin migration                            | -            | -       | -       | -            | X              | 4                    |
|                                            | en       | painful migration of k-wires             | -            | -       | -       | -            | X              | 1                    |
|                                            | de       | pinwanderung                             | -            | -       | -       | -            | X              | 1                    |
| Prosthesis                                 |          |                                          |              |         |         |              |                |                      |
|                                            | en       | varus mobilization of stem               | -            | -       | -       | X            | -              | 1                    |
|                                            | en       | superior migration of humeral prosthesis | -            | -       | -       | X            | -              | 1                    |
|                                            | en       | superior migration pf the prosthesis     | -            | -       | -       | X            | -              | 1                    |
|                                            | en       | subsidence and malrotation of the stem   | -            | -       | -       | X            | -              | 1                    |
|                                            | en       | mobilization of the glenoid component    | -            | -       | -       | X            | -              | 1                    |
|                                            | en       | superior migration                       | -            | -       | -       | X            | -              | 1                    |
|                                            | en       | migration                                | -            | -       | -       | X            | -              | 1                    |
|                                            | en       | implant instability                      | -            | -       | -       | X            | -              | 1                    |
|                                            | en       | subsidence of the head                   | -            | X       | -       | -            | -              | 1                    |
|                                            | en       | mobilization of the implant              | -            | X       | -       | -            | -              | 1                    |
|                                            | en       | rod migration                            | -            | -       | X       | -            | -              | 1                    |
|                                            | en       | hardware migration                       | -            | -       | -       | -            | X              | 1                    |
|                                            | de       | sekundäre dislokation des implantates    | -            | -       | X       | -            | -              | 1                    |

| Event group and specification terms                        | Language | Extracted event terms                | Non-surgical | Plating | Nailing | Arthroplasty | Other surgical | Number of references |
|------------------------------------------------------------|----------|--------------------------------------|--------------|---------|---------|--------------|----------------|----------------------|
| <b>Radiolucency around the implant / Implant loosening</b> |          |                                      |              |         |         |              |                |                      |
|                                                            | en       | signs of loosening                   | -            | -       | -       | X            | -              | 1                    |
|                                                            | en       | pin loosening                        | -            | -       | -       | -            | X              | 2                    |
|                                                            | en       | osteolysis                           | -            | -       | -       | X            | -              | 1                    |
|                                                            | en       | loosening/failure of the devices     | -            | X       | -       | X            | X              | 1                    |
|                                                            | en       | loosening of an implant              | -            | X       | -       | -            | -              | 1                    |
|                                                            | en       | loosening                            | -            | X       | -       | X            | -              | 3                    |
|                                                            | en       | humeral implant loosening            | -            | -       | -       | X            | -              | 1                    |
|                                                            | en       | implant loosening                    | -            | X       | X       | X            | -              | 7                    |
|                                                            | en       | humeral loosening                    | -            | -       | -       | X            | -              | 1                    |
|                                                            | en       | secondary head implant loosening     | -            | X       | -       | -            | -              | 1                    |
|                                                            | en       | hardware loosening                   | -            | X       | -       | -            | -              | 1                    |
|                                                            | en       | aseptic loosening                    | -            | -       | -       | X            | -              | 2                    |
|                                                            | de       | auslockerung                         | -            | -       | -       | -            | X              | 1                    |
|                                                            | de       | auslockerung implantat               | -            | -       | X       | -            | -              | 1                    |
|                                                            | de       | implantatlockerung                   | -            | -       | X       | -            | -              | 1                    |
|                                                            | de       | plattenlockerung                     | -            | X       | -       | -            | -              | 1                    |
| Prosthesis                                                 | en       | stem loosening                       | -            | -       | -       | X            | -              | 1                    |
|                                                            | en       | prosthetic loosening                 | -            | -       | -       | X            | -              | 2                    |
|                                                            | en       | component loosening                  | -            | -       | -       | X            | -              | 2                    |
|                                                            | en       | signs of humeral component loosening | -            | -       | -       | X            | -              | 1                    |
|                                                            | en       | aseptic humeral stem loosening       | -            | -       | -       | X            | -              | 1                    |
|                                                            | en       | aseptic glenoid loosening            | -            | -       | -       | X            | -              | 1                    |
|                                                            | en       | loosening of the glenosphere         | -            | -       | -       | X            | -              | 1                    |
|                                                            | en       | loosening of the glenoid component   | -            | -       | -       | X            | -              | 1                    |
|                                                            | en       | glenoid component loosening          | -            | -       | -       | X            | -              | 2                    |
|                                                            | de       | glenoidale lockierung                | -            | -       | -       | X            | -              | 1                    |
| <b>Breakage</b>                                            |          |                                      |              |         |         |              |                |                      |
|                                                            | en       | screw breakage                       | -            | X       | -       | -            | -              | 2                    |
|                                                            | en       | plate breakage                       | -            | X       | -       | -            | -              | 5                    |
|                                                            | en       | nail breakage                        | -            | -       | X       | -            | -              | 1                    |
|                                                            | en       | intraoperative plate breakage        | -            | X       | -       | -            | -              | 1                    |
|                                                            | en       | breakage                             | -            | X       | -       | -            | -              | 2                    |
|                                                            | en       | hardware breakage                    | -            | X       | -       | -            | -              | 1                    |
|                                                            | en       | hardware fractures                   | -            | X       | -       | -            | -              | 1                    |
|                                                            | en       | implant fracture                     | -            | X       | -       | -            | -              | 1                    |

| Event group and specification terms | Language    | Extracted event terms                   | Non-surgical | Plating | Nailing | Arthroplasty | Other surgical | Number of references |
|-------------------------------------|-------------|-----------------------------------------|--------------|---------|---------|--------------|----------------|----------------------|
| Failure                             | en          | hardware failure                        | -            | X       | -       | -            | -              | 6                    |
|                                     | en          | implant failure                         | -            | X       | X       | X            | X              | 17                   |
|                                     | en          | fatigue failure                         | -            | X       | -       | -            | -              | 1                    |
|                                     | en          | device failure                          | -            | X       | -       | -            | -              | 1                    |
|                                     | en          | failure                                 | -            | X       | -       | -            | -              | 1                    |
|                                     | en          | plate failure                           | -            | X       | -       | -            | -              | 1                    |
|                                     | en          | screw failure                           | -            | -       | X       | -            | -              | 1                    |
|                                     | en          | mechanical failure                      | -            | X       | -       | -            | -              | 3                    |
|                                     | en          | construct failure                       | -            | X       | X       | -            | -              | 3                    |
|                                     | de          | implantatbruch                          | -            | X       | -       | -            | -              | 1                    |
|                                     | de          | implantatversagen                       | -            | -       | -       | -            | X              | 1                    |
|                                     | de          | osteosyntheseversagen                   | -            | X       | -       | -            | -              | 1                    |
|                                     | Disassembly | en                                      | disassembly  | -       | X       | -            | -              | -                    |
| <b>Malpositioning</b>               |             |                                         |              |         |         |              |                |                      |
|                                     | en          | wrong screw positioning                 | -            | X       | X       | -            | -              | 1                    |
|                                     | en          | too high nail                           | -            | -       | X       | -            | -              | 1                    |
|                                     | en          | prosthesis malpositioning               | -            | -       | -       | X            | -              | 1                    |
|                                     | en          | primary malposition of the implant      | -            | X       | -       | -            | -              | 1                    |
|                                     | en          | poor plate positioning                  | -            | X       | -       | -            | -              | 1                    |
|                                     | en          | overstuffing of the joint               | -            | -       | -       | X            | -              | 1                    |
|                                     | en          | inadequate implant position             | -            | X       | -       | -            | -              | 1                    |
|                                     | en          | improper humeral head position          | -            | -       | -       | X            | -              | 1                    |
|                                     | en          | implant malposition                     | -            | X       | -       | X            | -              | 2                    |
|                                     | en          | implant malpositioning                  | -            | -       | -       | X            | -              | 2                    |
|                                     | en          | implant malpositioning causing revision | -            | -       | X       | -            | -              | 1                    |
|                                     | en          | implant protrusion                      | -            | -       | X       | -            | -              | 1                    |
|                                     | en          | component malposition                   | -            | -       | -       | X            | -              | 1                    |
|                                     | de          | offsetfehler bei zu hoher kopfkalotte   | -            | -       | -       | X            | -              | 1                    |
|                                     | de          | fehlerhafte implantationshöhe           | -            | -       | -       | X            | -              | 1                    |
|                                     | de          | plattenfehllage                         | -            | X       | -       | -            | -              | 1                    |
|                                     | de          | horizontale offsetfehler                | -            | -       | -       | X            | -              | 1                    |
|                                     | de          | implantatfehllage                       | -            | X       | X       | -            | X              | 1                    |
|                                     | de          | implantatüberstand                      | -            | -       | X       | -            | -              | 1                    |
|                                     | de          | torsionsfehler                          | -            | -       | -       | X            | -              | 1                    |
|                                     | de          | rotationsfehler                         | -            | -       | X       | -            | -              | 1                    |

| Event group and specification terms      | Language | Extracted event terms                   | Non-surgical | Plating | Nailing | Arthroplasty | Other surgical | Number of references |
|------------------------------------------|----------|-----------------------------------------|--------------|---------|---------|--------------|----------------|----------------------|
| <b>Screw or bolt backout / loosening</b> |          |                                         |              |         |         |              |                |                      |
|                                          | en       | windshield-wiper effect                 | -            | X       | -       | -            | -              | 1                    |
|                                          | en       | screw loosening                         | -            | X       | X       | -            | -              | 4                    |
|                                          | en       | loosening of the screw                  | -            | X       | -       | -            | -              | 1                    |
|                                          | en       | loosening of the proximal screw         | -            | -       | X       | -            | -              | 1                    |
|                                          | en       | loose plate and screws                  | -            | X       | -       | -            | -              | 1                    |
|                                          | en       | loosening of a single screw             | -            | X       | -       | -            | -              | 1                    |
|                                          | en       | screw migration                         | -            | X       | X       | -            | X              | 3                    |
|                                          | en       | proximal screw migration                | -            | -       | X       | -            | -              | 1                    |
|                                          | en       | screw pullout                           | -            | X       | -       | -            | -              | 1                    |
|                                          | en       | screw back-out                          | -            | -       | X       | -            | -              | 2                    |
|                                          | en       | screw backing out                       | -            | X       | -       | -            | -              | 3                    |
|                                          | en       | pull-out failure                        | -            | X       | -       | -            | -              | 1                    |
|                                          | en       | proximal interlocking screw backing out | -            | -       | X       | -            | -              | 1                    |
|                                          | en       | plate pullout                           | -            | X       | -       | -            | -              | 2                    |
|                                          | en       | plate pull-out                          | -            | X       | -       | -            | -              | 1                    |
|                                          | en       | lateral backing out                     | -            | -       | X       | -            | -              | 1                    |
|                                          | en       | backing out of screws                   | -            | -       | X       | -            | -              | 1                    |
|                                          | en       | backing out of the proximal screw       | -            | -       | X       | -            | -              | 1                    |
|                                          | en       | backout                                 | -            | X       | -       | -            | -              | 1                    |
|                                          | en       | diaphyseal screw back-out               | -            | X       | -       | -            | -              | 1                    |
|                                          | en       | epiphyseal screw back-out               | -            | X       | -       | -            | -              | 1                    |
|                                          | en       | screw failure and backout               | -            | X       | -       | -            | X              | 1                    |
|                                          | de       | backing-out der schrauben               | -            | -       | X       | -            | -              | 1                    |
|                                          | de       | schraubenlockerung                      | -            | X       | -       | -            | -              | 2                    |
| <b>Hardware local irritation</b>         |          |                                         |              |         |         |              |                |                      |
|                                          | en       | hardware intolerance                    | -            | X       | -       | -            | -              | 1                    |
|                                          | en       | hardware irritation                     | -            | X       | -       | -            | -              | 1                    |
| <b>Other</b>                             |          |                                         |              |         |         |              |                |                      |
|                                          | en       | metalwork problems                      | -            | X       | X       | X            | X              | 1                    |
|                                          | en       | component misalignment                  | -            | -       | -       | X            | -              | 1                    |
|                                          | de       | intraartikulärer zementaustritt         | -            | X       | -       | -            | -              | 1                    |

| Event group and specification terms                                                                           | Language | Extracted event terms                                      | Non-surgical | Plating | Nailing | Arthroplasty | Other surgical | Number of references |
|---------------------------------------------------------------------------------------------------------------|----------|------------------------------------------------------------|--------------|---------|---------|--------------|----------------|----------------------|
| <b>2- Osteochondral events</b>                                                                                |          |                                                            |              |         |         |              |                |                      |
| <b>Bone formation / resorption (specifications including notching, osteochondral erosions, and bone cyst)</b> |          |                                                            |              |         |         |              |                |                      |
|                                                                                                               | en       | humeral bone loss                                          | -            | -       | -       | X            | -              | 1                    |
| Notching                                                                                                      | en       | clinically silent scapular notching                        | -            | -       | -       | X            | -              | 1                    |
|                                                                                                               | en       | scapular notching                                          | -            | -       | -       | X            | -              | 15                   |
|                                                                                                               | en       | reverse prosthesis: glenoid notching                       | -            | -       | -       | X            | -              | 1                    |
|                                                                                                               | en       | groove                                                     | -            | -       | -       | X            | -              | 1                    |
|                                                                                                               | en       | scapular neck notching                                     | -            | -       | -       | X            | -              | 1                    |
|                                                                                                               | en       | inferior notching                                          | -            | -       | -       | X            | -              | 1                    |
|                                                                                                               | en       | inferior scapular notch                                    | -            | -       | -       | X            | -              | 1                    |
|                                                                                                               | en       | inferior scapular notching                                 | -            | -       | -       | X            | -              | 1                    |
|                                                                                                               | en       | inferiores glenoid-notching                                | -            | -       | -       | X            | -              | 1                    |
|                                                                                                               | en       | notches                                                    | -            | -       | -       | X            | -              | 1                    |
|                                                                                                               | en       | notching                                                   | -            | -       | -       | X            | -              | 2                    |
|                                                                                                               | de       | inferiores skapulanotching                                 | -            | -       | -       | X            | -              | 1                    |
| Heterotopic bone formation                                                                                    | en       | heterotopic bone formation                                 | X            | X       | X       | X            | X              | 1                    |
|                                                                                                               | en       | ectopic ossification                                       | -            | -       | -       | X            | -              | 2                    |
|                                                                                                               | en       | ectopic bone formation                                     | -            | -       | -       | X            | -              | 2                    |
|                                                                                                               | en       | heterotopic ossification                                   | -            | X       | X       | X            | X              | 7                    |
|                                                                                                               | en       | ossification                                               | -            | -       | -       | X            | -              | 1                    |
|                                                                                                               | de       | heterotoper ossifikationen                                 | -            | -       | -       | X            | -              | 1                    |
| Glenoid erosion                                                                                               | en       | erosion of the glenoid                                     | -            | -       | -       | X            | -              | 1                    |
|                                                                                                               | en       | secondary glenoid destruction                              | -            | X       | -       | -            | -              | 1                    |
|                                                                                                               | en       | glenoid destruction                                        | -            | X       | -       | -            | -              | 1                    |
|                                                                                                               | en       | articular cartilage injury                                 | -            | -       | X       | -            | -              | 1                    |
| <b>Arthritis</b>                                                                                              |          |                                                            |              |         |         |              |                |                      |
|                                                                                                               | en       | degenerative arthritis                                     | X            | X       | -       | -            | -              | 1                    |
|                                                                                                               | en       | destruction of the proximal articular surface              | -            | -       | X       | -            | -              | 1                    |
|                                                                                                               | en       | posttraumatic osteoarthritis                               | -            | X       | -       | -            | -              | 1                    |
|                                                                                                               | en       | posttraumatic arthritis                                    | -            | X       | -       | -            | -              | 1                    |
|                                                                                                               | en       | postraumatic glenoid degeneration                          | -            | -       | -       | X            | -              | 1                    |
|                                                                                                               | en       | post-traumatic osteoarthritis                              | -            | X       | -       | -            | -              | 1                    |
|                                                                                                               | en       | post-traumatic shoulder osteoarthritis according to Gerber | -            | X       | -       | -            | -              | 1                    |
|                                                                                                               | en       | post-traumatic arthritis                                   | X            | -       | -       | -            | X              | 1                    |
|                                                                                                               | en       | posttraumatische arthrose                                  | X            | X       | X       | -            | X              | 1                    |
|                                                                                                               | de       | sekundäre glenoidarthrose                                  | -            | -       | -       | X            | -              | 1                    |

| Event group and specification terms | Language | Extracted event terms                            | Non-surgical | Plating | Nailing | Arthroplasty | Other surgical | Number of references |
|-------------------------------------|----------|--------------------------------------------------|--------------|---------|---------|--------------|----------------|----------------------|
| <b>Fracture around the implant</b>  |          |                                                  |              |         |         |              |                |                      |
|                                     | en       | peri-implant fracture                            | -            | X       | -       | -            | -              | 2                    |
|                                     | en       | peri-implant fractures                           | -            | -       | X       | -            | -              | 1                    |
|                                     | en       | fracture                                         | -            | -       | -       | X            | -              | 1                    |
|                                     | en       | iatrogenic fracture                              | -            | -       | -       | X            | -              | 1                    |
|                                     | en       | iatrogenic fractures                             | -            | -       | X       | X            | -              | 2                    |
|                                     | en       | refracture                                       | -            | X       | X       | -            | -              | 3                    |
|                                     | en       | distal fracture extension                        | -            | X       | -       | -            | -              | 1                    |
| Periprosthetic                      | en       | traumatic periprosthetic fracture                | -            | -       | -       | X            | -              | 1                    |
|                                     | en       | periprosthetic humeral fracture                  | -            | -       | -       | X            | -              | 1                    |
|                                     | en       | intra-operative periprosthetic fracture          | -            | -       | -       | X            | -              | 1                    |
|                                     | en       | intraoperativ periprosthetic fractures           | -            | -       | -       | X            | -              | 1                    |
|                                     | en       | periprosthetic fracture                          | -            | -       | -       | X            | -              | 3                    |
| Nail                                | en       | fracture through the entry point of the nail     | -            | -       | X       | -            | -              | 1                    |
| Plate                               | en       | fractures distal to the plate                    | -            | X       | -       | -            | -              | 1                    |
| Humerus fracture                    | en       | intraoperative fracture of the humerus           | -            | -       | -       | X            | -              | 1                    |
|                                     | en       | diaphyseal fracture of the humerus               | -            | -       | -       | X            | -              | 1                    |
|                                     | en       | humeral shaft fracture                           | -            | -       | -       | X            | -              | 1                    |
|                                     | en       | intraoperative diaphyseal fissure                | -            | -       | -       | X            | -              | 1                    |
|                                     | en       | intraoperative diaphyseal fracture               | -            | -       | -       | X            | -              | 1                    |
| Tuberosity fracture                 | en       | splitting the greater tuberosity                 | -            | -       | X       | -            | -              | 1                    |
|                                     | en       | greater tuberosity fractures                     | -            | -       | X       | -            | -              | 1                    |
|                                     | en       | iatrogenic tuberosity fracture                   | -            | -       | X       | -            | -              | 1                    |
|                                     | en       | secondary lesser tuberosity fracture dislocation | -            | X       | -       | -            | -              | 1                    |
| Acromion fracture                   | en       | acromial fracture                                | -            | -       | -       | X            | -              | 2                    |
|                                     | en       | intraoperative fracture of acromion              | -            | -       | -       | X            | -              | 1                    |
|                                     | en       | fracture of the acromion                         | -            | -       | -       | X            | -              | 1                    |
|                                     | en       | acromial stress fracture                         | -            | -       | -       | X            | -              | 1                    |
|                                     | en       | acromion fracture                                | -            | -       | -       | X            | -              | 4                    |
| Scapula spine fracture              | en       | spine of scapula fracture                        | -            | -       | -       | X            | -              | 1                    |
|                                     | en       | intraoperative fracture of spine of scapula      | -            | -       | -       | X            | -              | 1                    |
| Glenoid fracture                    | en       | intraoperative glenoid fracture                  | -            | -       | -       | X            | -              | 1                    |
|                                     | en       | intraoperative fracture of glenoid               | -            | -       | -       | X            | -              | 1                    |
|                                     | en       | fracture of the glenoid                          | -            | -       | -       | X            | -              | 1                    |
|                                     | en       | glenoid fracture                                 | -            | -       | -       | X            | -              | 1                    |
|                                     | de       | glenoidfrakturen                                 | -            | -       | -       | X            | -              | 1                    |

| Event group and specification terms                                        | Language                         | Extracted event terms                        | Non-surgical                                | Plating | Nailing | Arthroplasty | Other surgical | Number of references |   |
|----------------------------------------------------------------------------|----------------------------------|----------------------------------------------|---------------------------------------------|---------|---------|--------------|----------------|----------------------|---|
| <b>Screw / bolt perforation (intra) &amp; Screw / bolt cutout (postop)</b> |                                  |                                              |                                             |         |         |              |                |                      |   |
| Cutout                                                                     | en                               | slight screw cutout                          | -                                           | X       | -       | -            | -              | 1                    |   |
|                                                                            | en                               | secondary screw cut-out                      | -                                           | X       | -       | -            | -              | 3                    |   |
|                                                                            | en                               | cut-out proximal screws after varus collapse | -                                           | X       | -       | -            | -              | 1                    |   |
|                                                                            | en                               | cutout of the screws                         | -                                           | X       | -       | -            | -              | 1                    |   |
|                                                                            | en                               | cutting out of screws                        | -                                           | X       | -       | -            | -              | 1                    |   |
|                                                                            | en                               | screw cutout                                 | -                                           | X       | X       | -            | X              | 16                   |   |
|                                                                            | en                               | angular stable screw cut out                 | -                                           | -       | X       | -            | -              | 1                    |   |
|                                                                            | en                               | primary screw cutout                         | -                                           | X       | -       | -            | -              | 3                    |   |
|                                                                            | en                               | screw cut-through                            | -                                           | X       | -       | -            | -              | 1                    |   |
|                                                                            | de                               | schrauben cut-out                            | -                                           | X       | -       | -            | -              | 1                    |   |
|                                                                            | de                               | cutout der schrauben                         | -                                           | X       | -       | -            | -              | 2                    |   |
|                                                                            | Perforation/Penetration          | en                                           | secondary screw perforation                 | -       | X       | -            | -              | -                    | 4 |
|                                                                            |                                  | en                                           | secondary intra-articular screw penetration | -       | X       | -            | -              | -                    | 1 |
|                                                                            |                                  | en                                           | screw joint penetration                     | -       | X       | -            | -              | -                    | 1 |
| en                                                                         |                                  | screw penetration                            | -                                           | X       | X       | -            | -              | 16                   |   |
| en                                                                         |                                  | screw penetration of the joint               | -                                           | X       | -       | -            | -              | 1                    |   |
| en                                                                         |                                  | screw perforation                            | -                                           | X       | X       | X            | X              | 14                   |   |
| en                                                                         |                                  | screw perforation into the joint space       | -                                           | X       | -       | -            | -              | 1                    |   |
| en                                                                         |                                  | screw perforation of the humeral head        | -                                           | X       | -       | -            | -              | 1                    |   |
| en                                                                         |                                  | screw perforation to the head                | -                                           | X       | -       | -            | -              | 1                    |   |
| en                                                                         |                                  | primary perforation of head screw            | -                                           | X       | -       | -            | -              | 1                    |   |
| en                                                                         |                                  | pin penetration of cartilage                 | -                                           | X       | -       | -            | -              | 1                    |   |
| en                                                                         |                                  | interlocking screw perforation               | -                                           | -       | X       | -            | -              | 1                    |   |
| en                                                                         |                                  | humeral head perforation                     | -                                           | X       | -       | -            | -              | 1                    |   |
| en                                                                         |                                  | perforation der kalotte                      | -                                           | X       | X       | -            | -              | 2                    |   |
| en                                                                         |                                  | head perforation                             | -                                           | X       | -       | -            | -              | 1                    |   |
| en                                                                         |                                  | glenohumeral screw penetration               | -                                           | -       | X       | -            | -              | 1                    |   |
| en                                                                         |                                  | articular screw penetration                  | -                                           | X       | X       | -            | -              | 1                    |   |
| en                                                                         |                                  | articular screw perforation                  | -                                           | X       | -       | -            | -              | 1                    |   |
| en                                                                         | perforation of head screws       | -                                            | X                                           | -       | -       | -            | 1              |                      |   |
| en                                                                         | perforation of the humeral head  | -                                            | X                                           | -       | -       | -            | 1              |                      |   |
| en                                                                         | cortical perforation             | -                                            | -                                           | -       | X       | -            | 1              |                      |   |
| en                                                                         | intraoperative screw perforation | -                                            | X                                           | -       | -       | -            | 1              |                      |   |
| en                                                                         | intra-articular screw            | -                                            | X                                           | -       | -       | -            | 1              |                      |   |
| en                                                                         | intra-articular screw placement  | -                                            | X                                           | -       | -       | -            | 1              |                      |   |

| Event group and specification terms      | Language | Extracted event terms                                                | Non-surgical | Plating | Nailing | Arthroplasty | Other surgical | Number of references |
|------------------------------------------|----------|----------------------------------------------------------------------|--------------|---------|---------|--------------|----------------|----------------------|
|                                          | en       | intra-articular screw penetration                                    | -            | X       | -       | -            | -              | 4                    |
|                                          | en       | intra-articular penetration of screws                                | -            | X       | -       | -            | -              | 1                    |
|                                          | en       | intra-articular migration of screws                                  | -            | X       | -       | -            | -              | 1                    |
|                                          | en       | joint penetration                                                    | -            | X       | -       | -            | -              | 2                    |
|                                          | en       | penetration of the proximal screw                                    | -            | X       | -       | -            | -              | 1                    |
|                                          | en       | primary screw perforation                                            | -            | X       | -       | -            | -              | 3                    |
|                                          | en       | primäre schraubenperforation                                         | -            | X       | -       | -            | -              | 1                    |
|                                          | de       | schraubenperforation                                                 | -            | X       | -       | -            | -              | 2                    |
|                                          | de       | nagelperforation                                                     | -            | -       | X       | -            | -              | 1                    |
|                                          | de       | perforation von schraubenspitzen ins gelenk                          | -            | -       | X       | -            | -              | 1                    |
|                                          | de       | perforation des implantates durch das kalottenfragment               | -            | -       | X       | -            | -              | 1                    |
|                                          | de       | perforation der spiralklinge durch die knorpelfläche der kopfkalotte | -            | -       | X       | -            | -              | 1                    |
|                                          | de       | Sekundäre Perforation                                                | -            | X       | -       | -            | -              | 1                    |
|                                          | de       | durchschneiden des implantates durch den kopf                        | -            | -       | X       | -            | -              | 1                    |
|                                          | en       | pin perforation                                                      | -            | -       | -       | -            | X              | 1                    |
|                                          | en       | synthesis material in the intra-articular space                      | -            | X       | -       | -            | X              | 1                    |
| Protrusion                               | en       | primary screw protrusion                                             | -            | X       | X       | -            | -              | 1                    |
|                                          | en       | protrusion of the osteosynthesis material                            | -            | X       | -       | -            | -              | 1                    |
|                                          | en       | secondary screw protrusion                                           | -            | X       | X       | -            | -              | 1                    |
|                                          | en       | screw/nail protrusion                                                | -            | -       | X       | -            | -              | 1                    |
|                                          | en       | screw protrusion                                                     | -            | X       | X       | -            | -              | 3                    |
|                                          | en       | nail protrusion                                                      | -            | -       | X       | -            | -              | 2                    |
|                                          | en       | blade plate protrusion                                               | -            | X       | -       | -            | -              | 1                    |
| <b>Tuberosity migration / resorption</b> |          |                                                                      |              |         |         |              |                |                      |
| Migration                                | en       | tuberosity fixation failure                                          | -            | -       | -       | X            | -              | 1                    |
|                                          | en       | tuberosity retraction                                                | -            | -       | -       | X            | -              | 1                    |
|                                          | en       | tuberosity displacement                                              | -            | X       | -       | X            | -              | 3                    |
|                                          | en       | tuberosity migration                                                 | -            | -       | -       | X            | -              | 2                    |
|                                          | en       | tuberosity detachment                                                | -            | -       | -       | X            | -              | 4                    |
|                                          | en       | tubercle migration                                                   | -            | -       | -       | X            | -              | 1                    |
|                                          | en       | superior migration of the great tuberosity                           | -            | -       | -       | X            | -              | 1                    |
|                                          | en       | secondary tuberosity displacement                                    | -            | -       | X       | X            | X              | 2                    |
|                                          | en       | secondary lesser tuberosity displacement                             | -            | X       | -       | -            | -              | 1                    |
|                                          | en       | secondary dislocation of the greater tuberosity                      | -            | X       | -       | -            | -              | 1                    |
|                                          | en       | secondary displacement of greater tuberosity                         | -            | -       | -       | X            | -              | 1                    |



| Event group and specification terms | Language | Extracted event terms                        | Non-surgical | Plating | Nailing | Arthroplasty | Other surgical | Number of references |
|-------------------------------------|----------|----------------------------------------------|--------------|---------|---------|--------------|----------------|----------------------|
|                                     | en       | posterior migration of the great tuberosity  | -            | -       | -       | X            | -              | 1                    |
|                                     | en       | migration of the greater tuberosity          | -            | -       | -       | X            | -              | 1                    |
|                                     | en       | migration of tuberosities                    | -            | -       | -       | X            | -              | 4                    |
|                                     | en       | migration der tubercula                      | -            | -       | -       | X            | -              | 1                    |
|                                     | en       | increasing degree of tuberosity displacement | -            | -       | -       | X            | -              | 1                    |
|                                     | en       | greater tuberosity migration                 | -            | X       | -       | -            | -              | 1                    |
|                                     | en       | cranial displaced greater tubercle           | -            | -       | X       | -            | -              | 1                    |
|                                     | en       | greater tuberosity displacement              | -            | -       | X       | -            | -              | 2                    |
|                                     | en       | greater tuberosity pull off                  | -            | -       | -       | X            | -              | 1                    |
|                                     | en       | displaced greater tuberosity                 | -            | X       | -       | -            | -              | 1                    |
|                                     | en       | displaced tuberosities                       | -            | -       | -       | X            | -              | 1                    |
|                                     | en       | displaced tuberosity after prosthesis        | -            | -       | -       | X            | -              | 1                    |
|                                     | en       | displacement of the greater tuberosity       | -            | X       | -       | -            | -              | 2                    |
|                                     | en       | displacement of tuberosities                 | -            | -       | -       | X            | -              | 1                    |
|                                     | en       | displaced lesser tuberosity fragment         | -            | X       | -       | -            | -              | 1                    |
|                                     | de       | sekundäre dislokation der tubercula          | -            | -       | -       | X            | -              | 1                    |
|                                     | de       | sekundäre dislokation des tuberculum minus   | -            | -       | X       | -            | -              | 1                    |
| Resorption                          | en       | absorption of the lesser tuberosity          | -            | -       | -       | X            | -              | 1                    |
|                                     | en       | tuberosity resorption                        | -            | X       | -       | X            | X              | 7                    |
|                                     | en       | tuberosity osteolysis                        | -            | -       | -       | X            | -              | 1                    |
|                                     | en       | tuberosity absorption                        | -            | -       | -       | X            | -              | 1                    |
|                                     | en       | tuberosities reabsorption                    | -            | -       | -       | X            | -              | 2                    |
|                                     | en       | resorption of the greater tuberosity         | -            | -       | X       | X            | -              | 2                    |
|                                     | en       | resorption of tuberosities                   | -            | -       | -       | X            | -              | 3                    |
|                                     | en       | greater tuberosity resorption                | -            | -       | -       | X            | -              | 2                    |
|                                     | en       | partial osteolysis of the greater tuberosity | -            | -       | -       | -            | X              | 1                    |
|                                     | en       | lysis of great tuberosity                    | -            | -       | -       | X            | -              | 1                    |
|                                     | de       | sekundäre resorption der tubercula           | -            | -       | -       | X            | -              | 1                    |
| <b>Osteonecrosis</b>                |          |                                              |              |         |         |              |                |                      |
| Necrosis in general                 | en       | partial avascular necrosis                   | -            | X       | -       | -            | -              | 1                    |
|                                     | en       | osteonecrosis                                | X            | X       | X       | X            | X              | 14                   |
|                                     | en       | necrosis                                     | -            | -       | X       | -            | -              | 1                    |
|                                     | en       | avascular necrosis                           | X            | X       | X       | X            | X              | 29                   |
|                                     | en       | avn                                          | X            | X       | -       | -            | -              | 2                    |
|                                     | de       | nekrose                                      | -            | X       | -       | -            | -              | 1                    |
|                                     | de       | avaskuläre nekrose                           | X            | X       | X       | -            | X              | 1                    |

| Event group and specification terms   | Language                    | Extracted event terms                                      | Non-surgical                                                | Plating | Nailing | Arthroplasty | Other surgical | Number of references |
|---------------------------------------|-----------------------------|------------------------------------------------------------|-------------------------------------------------------------|---------|---------|--------------|----------------|----------------------|
| Humeral head necrosis                 | en                          | humeral neck necrosis                                      | -                                                           | X       | -       | -            | -              | 1                    |
|                                       | en                          | secondary post-operative osteonecrosis of the humeral head | -                                                           | -       | X       | -            | -              | 1                    |
|                                       | en                          | post-traumatic humeral head necrosis according to Cruess   | -                                                           | X       | -       | -            | -              | 1                    |
|                                       | en                          | osteonecrosis of humeral head                              | -                                                           | -       | X       | -            | -              | 1                    |
|                                       | en                          | osteonecrosis of the humeral head                          | X                                                           | X       | X       | -            | X              | 10                   |
|                                       | en                          | necrosis of the humeral head                               | X                                                           | X       | X       | -            | X              | 2                    |
|                                       | en                          | necrosis of the head                                       | -                                                           | X       | X       | -            | X              | 1                    |
|                                       | en                          | avascular necrosis of the humeral articular fragment       | -                                                           | X       | -       | -            | -              | 1                    |
|                                       | en                          | avascular necrosis of the humeral head                     | X                                                           | X       | -       | -            | -              | 9                    |
|                                       | en                          | humeral head necrosis                                      | -                                                           | X       | X       | -            | X              | 9                    |
|                                       | en                          | humeral head osteonecrosis                                 | -                                                           | X       | -       | -            | -              | 2                    |
|                                       | en                          | humeral head avascular necrosis                            | -                                                           | X       | -       | -            | -              | 1                    |
|                                       | en                          | head avascular necrosis                                    | X                                                           | X       | X       | -            | X              | 1                    |
|                                       | de                          | aseptische kopfnekrose                                     | -                                                           | -       | X       | -            | -              | 1                    |
|                                       | de                          | humeruskopfnekrose                                         | -                                                           | X       | -       | -            | -              | 3                    |
|                                       | Tuberosity necrosis         | en                                                         | avascular necrosis of the humeral head and the tuberosities | -       | X       | -            | -              | -                    |
| en                                    |                             | avascular necrosis of the tuberosities                     | -                                                           | X       | -       | -            | -              | 1                    |
| en                                    |                             | secondary osteonecrosis of the tuberosities                | -                                                           | -       | X       | -            | -              | 1                    |
| en                                    |                             | tuberosity necrosis                                        | -                                                           | -       | -       | X            | -              | 1                    |
| <b>Delayed / non-union / malunion</b> |                             |                                                            |                                                             |         |         |              |                |                      |
| Delayed union                         | en                          | prolonged delayed union                                    | X                                                           | X       | X       | -            | X              | 1                    |
|                                       | en                          | delayed callus formation                                   | -                                                           | X       | -       | -            | -              | 1                    |
|                                       | en                          | delayed healing                                            | -                                                           | X       | -       | -            | X              | 2                    |
|                                       | en                          | delayed union                                              | X                                                           | X       | X       | X            | X              | 6                    |
|                                       | de                          | verzögerte heilung                                         | -                                                           | -       | X       | -            | -              | 1                    |
| Nonunion                              | en                          | lack of repair                                             | -                                                           | X       | -       | -            | -              | 1                    |
|                                       | en                          | lack of union                                              | -                                                           | -       | -       | X            | -              | 1                    |
|                                       | en                          | pseudarthrosis                                             | X                                                           | X       | X       | X            | X              | 8                    |
|                                       | en                          | fracture nonunion                                          | X                                                           | X       | X       | -            | X              | 3                    |
|                                       | en                          | aseptic non-union                                          | -                                                           | X       | -       | -            | -              | 1                    |
|                                       | en                          | nonunion of the fracture                                   | -                                                           | X       | -       | -            | -              | 1                    |
|                                       | en                          | bone nonunion                                              | -                                                           | X       | -       | -            | -              | 1                    |
|                                       | en                          | lack of consolidation                                      | -                                                           | -       | -       | X            | -              | 1                    |
|                                       | en                          | nonunion                                                   | X                                                           | X       | X       | X            | X              | 56                   |
|                                       | en                          | pseudarthrose                                              | X                                                           | X       | -       | -            | -              | 2                    |
| de                                    | ausbleibende frakturheilung | X                                                          | X                                                           | X       | -       | X            | 1              |                      |

| Event group and specification terms | Language                 | Extracted event terms                   | Non-surgical    | Plating | Nailing | Arthroplasty | Other surgical | Number of references |
|-------------------------------------|--------------------------|-----------------------------------------|-----------------|---------|---------|--------------|----------------|----------------------|
| Tuberosties                         | en                       | repair failure of tuberosties           | -               | -       | -       | X            | -              | 1                    |
|                                     | en                       | failure of tuberosty healing            | -               | -       | -       | X            | -              | 1                    |
|                                     | en                       | tuberosty nonunion                      | -               | -       | -       | X            | -              | 6                    |
|                                     | en                       | tubercle nonunion                       | -               | -       | -       | X            | -              | 1                    |
|                                     | en                       | tuberosties nonunion                    | -               | -       | -       | X            | -              | 1                    |
|                                     | en                       | greater tuberosty non-union             | -               | -       | -       | X            | -              | 2                    |
|                                     | en                       | greater tuberosty nonunion              | -               | X       | X       | X            | -              | 4                    |
|                                     | en                       | nonunion of the greater tuberosty       | -               | -       | -       | X            | -              | 1                    |
|                                     | en                       | nonunion of the tuberosties             | -               | -       | -       | X            | -              | 2                    |
|                                     | en                       | pseudoarthrosis of the lesser tuberosty | -               | -       | -       | -            | X              | 1                    |
|                                     | en                       | tuberosty failure                       | -               | -       | -       | X            | -              | 1                    |
|                                     | en                       | tuberosty malposition                   | -               | -       | -       | X            | -              | 1                    |
|                                     | Malunion                 | en                                      | varus deformity | -       | X       | X            | -              | -                    |
| en                                  |                          | varus malalignement                     | -               | -       | X       | -            | -              | 1                    |
| en                                  |                          | posttraumatic malunion                  | -               | -       | -       | X            | -              | 1                    |
| en                                  |                          | malunited proximal humerus fractures    | -               | -       | -       | X            | -              | 1                    |
| en                                  |                          | malunion with varus deformity           | -               | X       | X       | -            | -              | 1                    |
| en                                  |                          | malunion                                | X               | X       | X       | X            | X              | 37                   |
| en                                  |                          | varus malunion                          | -               | X       | X       | -            | -              | 7                    |
| en                                  |                          | varus malalignment                      | -               | X       | -       | -            | -              | 2                    |
| en                                  |                          | varus deformity of the surgical neck    | -               | -       | X       | -            | -              | 1                    |
| en                                  |                          | secondary varus angulation              | -               | X       | -       | -            | -              | 1                    |
| en                                  |                          | secondary varus deformity               | -               | X       | X       | -            | -              | 1                    |
| en                                  |                          | secondary varus malalignment            | -               | X       | -       | -            | -              | 1                    |
| en                                  |                          | mal-rotation                            | -               | X       | -       | -            | -              | 1                    |
| de                                  |                          | varusdeformität                         | -               | X       | -       | -            | -              | 1                    |
| de                                  |                          | varusfehlstellung                       | X               | X       | -       | -            | -              | 1                    |
| de                                  | varus des kopffragmentes | -                                       | -               | X       | -       | -            | 1              |                      |
| Tuberosties                         | en                       | mal-union of the tuberosty              | -               | -       | -       | X            | -              | 1                    |
|                                     | en                       | tuberosty malalignment                  | -               | -       | -       | X            | -              | 1                    |
|                                     | en                       | tuberosty malunion                      | -               | -       | -       | X            | -              | 4                    |
|                                     | en                       | malunion of the greater tuberosty       | -               | -       | -       | X            | -              | 1                    |
|                                     | en                       | greater tuberosty malunion              | X               | X       | X       | X            | X              | 5                    |
|                                     | en                       | lack of healing of tuberosties          | -               | -       | -       | X            | -              | 1                    |
|                                     | en                       | malunion of the tuberosties             | X               | X       | X       | X            | X              | 4                    |
|                                     | en                       | arm lengthening greater than 20 mm      | -               | -       | -       | X            | -              | 1                    |

| Event group and specification terms                              | Language | Extracted event terms                 | Non-surgical | Plating | Nailing | Arthroplasty | Other surgical | Number of references |
|------------------------------------------------------------------|----------|---------------------------------------|--------------|---------|---------|--------------|----------------|----------------------|
| <b>Mal-reduction / loss of reduction / fracture displacement</b> |          |                                       |              |         |         |              |                |                      |
|                                                                  | en       | failure of fixation                   | -            | X       | -       | X            | X              | 3                    |
|                                                                  | en       | failure of fracture fixation          | -            | X       | -       | -            | -              | 1                    |
| Primary fracture reduction                                       | en       | tuberosity malposition                | -            | -       | -       | X            | -              | 6                    |
|                                                                  | en       | varus malposition                     | -            | X       | -       | -            | -              | 1                    |
|                                                                  | en       | varus malreduction                    | -            | X       | -       | -            | -              | 1                    |
|                                                                  | en       | head varus reduction                  | -            | -       | -       | -            | X              | 1                    |
|                                                                  | en       | high head reduction                   | -            | -       | -       | -            | X              | 1                    |
|                                                                  | en       | malreduction                          | X            | X       | -       | -            | X              | 7                    |
|                                                                  | en       | malpositioning of fracture fragments  | -            | X       | -       | -            | -              | 1                    |
|                                                                  | en       | malpositioning                        | -            | -       | -       | X            | -              | 1                    |
|                                                                  | en       | malposition of tuberosities           | -            | -       | -       | X            | -              | 1                    |
|                                                                  | en       | malposition of the tuberosities       | -            | -       | X       | -            | -              | 1                    |
|                                                                  | en       | tuberosity misalignment               | -            | -       | -       | X            | -              | 1                    |
|                                                                  | en       | malposition des tuberculum majus      | -            | -       | -       | X            | -              | 1                    |
|                                                                  | en       | malposition                           | -            | X       | -       | -            | -              | 1                    |
|                                                                  | en       | reduced primary fixation stability    | -            | -       | -       | -            | X              | 1                    |
|                                                                  | en       | poor humeral head fixation            | -            | X       | -       | -            | -              | 1                    |
|                                                                  | en       | poor head purchase                    | -            | X       | -       | -            | -              | 1                    |
|                                                                  | en       | fracture distraction                  | X            | -       | -       | -            | -              | 1                    |
|                                                                  | en       | mal-positioning of fracture fragments | -            | -       | X       | -            | -              | 1                    |
|                                                                  | en       | mal-alignment of fragments            | -            | -       | X       | -            | -              | 1                    |
|                                                                  | en       | primarily loss of reduction           | -            | X       | -       | -            | -              | 1                    |
|                                                                  | en       | intraoperative malreduction           | -            | -       | X       | -            | -              | 1                    |
|                                                                  | en       | insufficient reduction                | -            | X       | -       | -            | -              | 2                    |
|                                                                  | en       | inadequate medial support             | -            | X       | -       | -            | -              | 1                    |
|                                                                  | en       | inadequate fracture reduction         | -            | X       | -       | -            | -              | 1                    |
|                                                                  | de       | ungenügende reposition                | -            | X       | -       | -            | -              | 1                    |
|                                                                  | de       | distraktionsfehler                    | -            | -       | X       | -            | -              | 1                    |
|                                                                  | de       | malpositionsfehler der tubercula      | -            | -       | -       | X            | -              | 1                    |
|                                                                  | de       | malpositionierung trochanter minor    | X            | X       | X       | -            | X              | 1                    |
| Secondary loss of fracture reduction / displacement              | en       | humeral head collapse                 | -            | X       | X       | -            | -              | 2                    |
|                                                                  | en       | reduction complication                | -            | X       | -       | -            | -              | 1                    |
|                                                                  | en       | subchondral collapse                  | -            | X       | -       | -            | -              | 1                    |
|                                                                  | en       | fracture collapse                     | -            | X       | -       | -            | -              | 1                    |

| Event group and specification terms | Language | Extracted event terms                            | Non-surgical | Plating | Nailing | Arthroplasty | Other surgical | Number of references |
|-------------------------------------|----------|--------------------------------------------------|--------------|---------|---------|--------------|----------------|----------------------|
|                                     | en       | medial calcar collapse                           | -            | X       | -       | -            | -              | 1                    |
|                                     | en       | collapse into varus position                     | -            | X       | -       | -            | -              | 1                    |
|                                     | en       | varus re-collapse                                | -            | X       | -       | -            | -              | 1                    |
|                                     | en       | varus fracture collapse                          | -            | X       | -       | -            | -              | 1                    |
|                                     | en       | varus collapse                                   | X            | X       | X       | -            | -              | 13                   |
|                                     | en       | fracture collapse into varus                     | -            | X       | -       | -            | -              | 1                    |
|                                     | en       | secondary loss of greater tuberosity reduction   | -            | X       | -       | -            | -              | 1                    |
|                                     | en       | loss of reduction major tubercle                 | -            | -       | -       | X            | -              | 1                    |
|                                     | en       | loss of reduction in tuberosities                | -            | -       | X       | -            | -              | 1                    |
|                                     | en       | loss of reduction of the greater tuberosity      | -            | X       | X       | -            | -              | 1                    |
|                                     | en       | loss of reduction of greater tuberosity          | -            | -       | -       | X            | -              | 1                    |
|                                     | en       | varus collapse at the fracture site              | -            | X       | -       | -            | -              | 1                    |
|                                     | en       | varus dislocation                                | -            | X       | -       | -            | -              | 1                    |
|                                     | en       | displacement                                     | X            | -       | X       | -            | -              | 2                    |
|                                     | en       | varus displacement                               | -            | X       | -       | -            | -              | 2                    |
|                                     | en       | varus displacement of the head                   | -            | X       | -       | -            | -              | 1                    |
|                                     | en       | varus displacement of the humeral head           | -            | X       | -       | -            | -              | 1                    |
|                                     | en       | varus or valgus displacement of the humeral head | -            | X       | -       | -            | -              | 1                    |
|                                     | en       | displacement of the humeral head                 | -            | -       | -       | -            | X              | 1                    |
|                                     | en       | head in varus                                    | -            | -       | -       | -            | X              | 1                    |
|                                     | en       | secondary displacement (cephalic varus)          | -            | -       | -       | -            | X              | 1                    |
|                                     | en       | varus progression                                | -            | X       | -       | -            | -              | 1                    |
|                                     | en       | secondary varus displacement                     | -            | X       | -       | -            | -              | 2                    |
|                                     | en       | secondary varus dislocation                      | -            | X       | -       | -            | -              | 1                    |
|                                     | en       | secondary loss of reduction                      | -            | X       | -       | -            | -              | 2                    |
|                                     | en       | secondary tilt                                   | -            | X       | -       | -            | -              | 1                    |
|                                     | en       | secondary fracture displacement                  | -            | X       | -       | -            | -              | 1                    |
|                                     | en       | secondary failure                                | -            | X       | -       | -            | -              | 1                    |
|                                     | en       | secondary displacement                           | X            | X       | X       | X            | X              | 8                    |
|                                     | en       | secondary dislocation                            | -            | X       | -       | -            | X              | 1                    |
|                                     | en       | reduction loss                                   | -            | X       | X       | -            | -              | 2                    |
|                                     | en       | redislokation tuberculum majus/minus             | -            | -       | X       | -            | -              | 1                    |
|                                     | en       | redislokation tuberculum majus                   | X            | -       | -       | -            | -              | 1                    |
|                                     | en       | recurrence of varus deformity                    | -            | X       | -       | -            | -              | 1                    |
|                                     | en       | proximal migration of the humerus                | -            | -       | -       | X            | -              | 1                    |
|                                     | en       | re-displacement of fragments                     | -            | -       | -       | -            | X              | 1                    |

| Event group and specification terms | Language | Extracted event terms                                                 | Non-surgical | Plating | Nailing | Arthroplasty | Other surgical | Number of references |
|-------------------------------------|----------|-----------------------------------------------------------------------|--------------|---------|---------|--------------|----------------|----------------------|
|                                     | en       | loss of the reduction                                                 | -            | X       | -       | -            | -              | 1                    |
|                                     | en       | loss of reduction                                                     | -            | X       | X       | X            | X              | 20                   |
|                                     | en       | loss of reduction of humeral head                                     | -            | X       | X       | -            | -              | 1                    |
|                                     | en       | loss of proximal fixation                                             | -            | -       | X       | -            | -              | 1                    |
|                                     | en       | loss of medial support                                                | -            | -       | X       | -            | -              | 1                    |
|                                     | en       | loss of humeral head reduction                                        | -            | X       | X       | -            | -              | 1                    |
|                                     | en       | loss of head height                                                   | -            | X       | -       | -            | -              | 1                    |
|                                     | en       | loss of fixation of fracture                                          | -            | -       | X       | -            | -              | 1                    |
|                                     | en       | loss of fixation                                                      | -            | X       | -       | X            | X              | 14                   |
|                                     | en       | postoperative displacement of the fracture site                       | -            | -       | X       | -            | -              | 1                    |
|                                     | en       | partial loss of reduction                                             | -            | X       | -       | -            | -              | 1                    |
|                                     | en       | clinically irrelevant secondary displacement                          | -            | -       | -       | -            | X              | 1                    |
|                                     | en       | fracture displacement                                                 | X            | X       | X       | -            | X              | 3                    |
|                                     | en       | fragment displacement                                                 | -            | X       | -       | -            | -              | 1                    |
|                                     | en       | fixation failure                                                      | -            | X       | -       | -            | -              | 7                    |
|                                     | en       | internal fixation failure                                             | -            | X       | -       | -            | -              | 1                    |
|                                     | en       | fixation failure from disruption of the buttress of the medial calcar | -            | X       | -       | -            | -              | 1                    |
|                                     | en       | fixation loss                                                         | -            | X       | -       | -            | -              | 1                    |
|                                     | de       | sekundäre varusabkippung                                              | -            | X       | -       | -            | -              | 1                    |
|                                     | de       | sekundärer korrekturverlust                                           | -            | X       | X       | -            | X              | 1                    |
|                                     | de       | fragment sekundärdisklokation                                         | -            | X       | -       | -            | -              | 1                    |
|                                     | de       | sekundäre dislokation                                                 | -            | X       | -       | -            | -              | 1                    |
|                                     | de       | repositionsverlust                                                    | -            | X       | -       | -            | -              | 1                    |
|                                     | de       | repositionsverlust mit und ohne schraubenperforation                  | -            | X       | -       | -            | -              | 1                    |
| Other                               | en       | devastation of the periosteum                                         | -            | X       | -       | -            | -              | 1                    |
|                                     | en       | cement-related thermal necrosis                                       | -            | -       | -       | X            | -              | 1                    |
|                                     | en       | periosteal stripping                                                  | -            | X       | -       | -            | -              | 1                    |
| <b>3- Shoulder instability</b>      |          |                                                                       |              |         |         |              |                |                      |
|                                     | en       | instability                                                           | -            | -       | -       | X            | -              | 8                    |
|                                     | en       | insufficient primary stability                                        | -            | -       | X       | -            | -              | 1                    |
|                                     | en       | joint instability                                                     | -            | -       | -       | X            | -              | 1                    |
|                                     | en       | medial instability                                                    | -            | X       | -       | -            | -              | 1                    |
|                                     | en       | instabilität/luxation                                                 | -            | -       | -       | X            | -              | 1                    |
|                                     | en       | instabilität                                                          | -            | -       | -       | X            | -              | 1                    |
| Subluxation                         | en       | subluxation                                                           | -            | -       | -       | X            | -              | 2                    |

| Event group and specification terms                           | Language | Extracted event terms           | Non-surgical | Plating | Nailing | Arthroplasty | Other surgical | Number of references |
|---------------------------------------------------------------|----------|---------------------------------|--------------|---------|---------|--------------|----------------|----------------------|
| Dislocation                                                   | en       | anterior dislocation            | -            | -       | -       | X            | -              | 2                    |
|                                                               | en       | prosthetic dislocation          | -            | -       | -       | X            | -              | 1                    |
|                                                               | en       | posterior dislocation           | -            | -       | -       | X            | -              | 1                    |
|                                                               | en       | persistent joint dislocation    | -            | X       | X       | -            | X              | 1                    |
|                                                               | en       | luxation                        | -            | -       | -       | X            | -              | 3                    |
|                                                               | en       | dislocation                     | -            | -       | X       | X            | -              | 16                   |
|                                                               | en       | dislocation of prosthesis       | -            | -       | -       | X            | -              | 1                    |
|                                                               | en       | dislocation of rsa              | -            | -       | -       | X            | -              | 1                    |
|                                                               | en       | dislocation of the humeral head | -            | X       | -       | -            | -              | 1                    |
| <b>4- Shoulder pain (idiopathic)</b>                          |          |                                 |              |         |         |              |                |                      |
|                                                               | en       | pain                            | X            | X       | X       | X            | X              | 25                   |
|                                                               | en       | painful hardware                | -            | X       | -       | -            | -              | 1                    |
|                                                               | en       | persistent pain                 | X            | X       | -       | X            | -              | 2                    |
|                                                               | en       | chronic pain                    | -            | -       | -       | X            | -              | 1                    |
|                                                               | en       | shoulder pain                   | X            | -       | X       | -            | -              | 3                    |
|                                                               | en       | soreness                        | -            | X       | -       | -            | -              | 1                    |
|                                                               | de       | schmerzen                       | -            | X       | X       | -            | -              | 2                    |
| <b>5- Peripheral neurological events</b>                      |          |                                 |              |         |         |              |                |                      |
|                                                               | en       | neurologic complications        | -            | X       | X       | X            | -              | 3                    |
|                                                               | en       | neurologic injury               | -            | X       | X       | X            | -              | 3                    |
|                                                               | en       | neurological complications      | -            | -       | -       | X            | -              | 1                    |
|                                                               | en       | neurological deficit            | -            | X       | -       | -            | -              | 1                    |
|                                                               | en       | neurological injuries           | -            | -       | -       | X            | -              | 1                    |
|                                                               | en       | neurological injury             | -            | -       | -       | X            | -              | 1                    |
| Sensory and/or motor disturbance: Cervical or brachial plexus | en       | plexus paralysis                | -            | -       | -       | X            | -              | 1                    |
|                                                               | en       | brachial plexopathy             | -            | -       | -       | X            | -              | 1                    |
|                                                               | en       | brachial plexus lesion          | -            | X       | -       | -            | -              | 1                    |
|                                                               | en       | brachial plexus nerve injury    | -            | -       | -       | X            | -              | 1                    |
|                                                               | en       | brachial plexus palsy           | -            | X       | X       | X            | X              | 1                    |
| Sensory and/or motor disturbance: Branch neuropathy           | en       | postoperative nerve damage      | -            | X       | -       | -            | -              | 1                    |
|                                                               | en       | peripheral nerve injury         | -            | X       | -       | X            | -              | 2                    |
|                                                               | en       | palsy                           | -            | -       | -       | X            | -              | 1                    |
|                                                               | en       | paresthesia                     | -            | X       | -       | -            | -              | 1                    |

| Event group and specification terms | Language | Extracted event terms                           | Non-surgical | Plating | Nailing | Arthroplasty | Other surgical | Number of references |
|-------------------------------------|----------|-------------------------------------------------|--------------|---------|---------|--------------|----------------|----------------------|
|                                     | en       | neurapraxia                                     | -            | X       | -       | -            | -              | 1                    |
|                                     | en       | neural disorder                                 | -            | -       | -       | X            | -              | 1                    |
|                                     | en       | nerve damage                                    | -            | X       | -       | -            | -              | 1                    |
|                                     | en       | nerve injuries                                  | -            | X       | -       | X            | -              | 3                    |
|                                     | en       | nerve injury                                    | -            | X       | X       | X            | X              | 5                    |
|                                     | en       | nerve palsy                                     | -            | X       | -       | X            | -              | 2                    |
|                                     | en       | nerv injury                                     | -            | X       | -       | -            | -              | 1                    |
|                                     | en       | injury to the neurovascular bundle              | -            | -       | -       | -            | X              | 1                    |
|                                     | en       | transient circumflex nerve palsy                | -            | X       | -       | -            | -              | 1                    |
|                                     | en       | injury to the nerve                             | -            | -       | -       | X            | -              | 1                    |
|                                     | en       | iatrogenic neurovascular injury                 | X            | X       | -       | -            | -              | 1                    |
|                                     | en       | iatrogenic neurological impairment              | -            | -       | -       | X            | -              | 1                    |
| Axillary nerve                      | en       | axillary nerve damage                           | -            | X       | -       | -            | -              | 3                    |
|                                     | en       | transient palsy of the axillary nerve           | -            | X       | -       | -            | -              | 1                    |
|                                     | en       | persistent palsy of the axillary nerve          | -            | X       | -       | -            | -              | 1                    |
|                                     | en       | neuropraxis of the axillary nerve               | -            | -       | -       | X            | -              | 1                    |
|                                     | en       | axillary nerve injury                           | -            | X       | -       | X            | X              | 11                   |
|                                     | en       | injury to the axillary nerve                    | -            | X       | X       | -            | X              | 2                    |
|                                     | en       | axillary nerve irritation                       | -            | X       | -       | -            | -              | 1                    |
|                                     | en       | axillary nerve lesion                           | -            | X       | -       | -            | -              | 1                    |
|                                     | en       | iatrogenic injury of axillary nerve             | -            | X       | -       | -            | X              | 2                    |
|                                     | en       | iatrogenic injury to the axillary nerve         | -            | X       | -       | -            | -              | 1                    |
|                                     | en       | iatrogenic neurotmesis of the axillary nerve    | -            | X       | -       | -            | X              | 1                    |
|                                     | en       | axillary nerve palsy                            | -            | X       | X       | X            | X              | 2                    |
|                                     | en       | axillary nerve/vascular injury                  | -            | X       | X       | -            | X              | 1                    |
|                                     | en       | decreased axillary nerve sensation              | -            | X       | -       | -            | -              | 1                    |
|                                     | en       | injury to anterior branch of the axillary nerve | -            | -       | -       | -            | X              | 1                    |
|                                     | de       | direkte schädigung nervus axillaris             | -            | -       | X       | -            | -              | 1                    |
|                                     | de       | verletzung n. axillaris                         | -            | -       | X       | -            | -              | 1                    |
|                                     | de       | neuropraxie des nervus (n.) axillaris           | -            | -       | -       | X            | -              | 1                    |
| Suprascapular nerve                 | en       | iatrogenic injury of suprascapular nerve        | -            | X       | -       | -            | X              | 1                    |
| Musculocutaneous nerve              | en       | injury to the musculocutaneous nerve            | -            | -       | -       | -            | X              | 1                    |
| Radial nerve                        | en       | injury to the radial nerve                      | -            | -       | X       | -            | X              | 1                    |
|                                     | en       | radial nerve injury                             | -            | X       | -       | X            | -              | 2                    |
|                                     | en       | nervus radialis läsion                          | -            | -       | -       | X            | -              | 1                    |
|                                     | de       | radialisläsion                                  | -            | X       | -       | -            | -              | 1                    |



| Event group and specification terms                       | Language | Extracted event terms                         | Non-surgical | Plating | Nailing | Arthroplasty | Other surgical | Number of references |
|-----------------------------------------------------------|----------|-----------------------------------------------|--------------|---------|---------|--------------|----------------|----------------------|
| Median nerve                                              | en       | median nerve injury                           | -            | -       | -       | X            | -              | 1                    |
| Ulnar nerve                                               | en       | ulnar nerve injury                            | -            | -       | -       | X            | -              | 1                    |
| Autonomic disturbance: CRPS                               | en       | regional pain syndrom                         | -            | -       | -       | X            | -              | 1                    |
|                                                           | en       | reflex sympathetic dystrophy                  | -            | -       | X       | X            | -              | 3                    |
|                                                           | en       | algodystrophy                                 | -            | -       | X       | X            | -              | 3                    |
|                                                           | en       | complex pain regional syndrome                | -            | -       | -       | X            | -              | 1                    |
|                                                           | en       | complex regional pain syndrom                 | -            | X       | X       | X            | X              | 6                    |
|                                                           | de       | komplexes regionales schmerzsyndrom           | -            | X       | -       | -            | -              | 1                    |
|                                                           | de       | arthrofibrose und CPRS                        | -            | -       | -       | X            | -              | 1                    |
| <b>6- Vascular events</b>                                 |          |                                               |              |         |         |              |                |                      |
| Hematoma which requires evacuation by needle or surgery   | en       | hematoma                                      | -            | X       | X       | X            | X              | 15                   |
|                                                           | en       | postoperative hematoma                        | -            | X       | -       | X            | -              | 3                    |
|                                                           | en       | retropectoral hematoma                        | -            | -       | -       | X            | -              | 1                    |
|                                                           | de       | nachblutung mit relevanter hämatomentwicklung | -            | -       | -       | X            | -              | 1                    |
| Superficial and deep thrombosis at the involved extremity | en       | injury to cephalic vein                       | -            | -       | -       | -            | X              | 1                    |
|                                                           | en       | phlebitis of upper limb                       | -            | -       | -       | X            | -              | 1                    |
|                                                           | en       | venous thromboembolism                        | -            | X       | X       | X            | X              | 1                    |
| Other                                                     | en       | axillary artery damage                        | -            | -       | -       | X            | -              | 1                    |
|                                                           | en       | injury to posterior humeral circumflex artery | -            | -       | -       | -            | X              | 1                    |
|                                                           | en       | posterior humeral circumflex artery injury    | -            | -       | -       | -            | X              | 1                    |
|                                                           | en       | postoperative vessel damage                   | -            | X       | -       | -            | -              | 1                    |
|                                                           | en       | vascular complications                        | -            | X       | -       | -            | -              | 1                    |
|                                                           | en       | vascular compromise                           | -            | X       | -       | -            | -              | 1                    |
|                                                           | en       | vascular disorder                             | -            | -       | -       | X            | -              | 1                    |
|                                                           | en       | vascular injuries                             | -            | X       | -       | -            | -              | 1                    |
|                                                           | en       | vascular injury                               | -            | -       | -       | X            | -              | 1                    |
|                                                           | en       | vasculo-nervous lesions                       | -            | -       | -       | X            | -              | 1                    |
| <b>7- Infections</b>                                      |          |                                               |              |         |         |              |                |                      |
|                                                           | en       | infection                                     | -            | X       | X       | X            | X              | 54                   |
|                                                           | en       | infection (propionibacterium acnes)           | -            | X       | X       | X            | X              | 1                    |
|                                                           | de       | infektion                                     | -            | -       | -       | X            | -              | 1                    |

| Event group and specification terms            | Language | Extracted event terms                                         | Non-surgical | Plating | Nailing | Arthroplasty | Other surgical | Number of references |
|------------------------------------------------|----------|---------------------------------------------------------------|--------------|---------|---------|--------------|----------------|----------------------|
| Surgical Site Infections (SSI):<br>superficial | en       | superficial wound infection                                   | -            | X       | X       | -            | -              | 3                    |
|                                                | en       | superficial surgical site infection                           | -            | -       | -       | X            | -              | 1                    |
|                                                | en       | superficial skin infection                                    | -            | X       | -       | -            | -              | 1                    |
|                                                | en       | superficial infection                                         | -            | X       | X       | X            | X              | 7                    |
|                                                | en       | incision infection                                            | -            | X       | -       | -            | -              | 1                    |
|                                                | en       | wound infection                                               | -            | X       | X       | X            | -              | 3                    |
|                                                | de       | wundinfektion                                                 | -            | X       | -       | -            | -              | 1                    |
|                                                | de       | wundinfekt                                                    | -            | X       | -       | -            | -              | 1                    |
|                                                | de       | wundheilungsstörungen und oberflächliche weichteilinfektionen | -            | -       | -       | X            | -              | 1                    |
| Surgical Site Infections (SSI):<br>deep        | en       | pin tract infection                                           | -            | -       | -       | -            | X              | 4                    |
|                                                | en       | pin tract-related infection                                   | -            | -       | -       | -            | X              | 1                    |
|                                                | en       | deep infection                                                | -            | X       | X       | X            | X              | 15                   |
|                                                | en       | deep wound infection                                          | -            | X       | -       | -            | -              | 1                    |
|                                                | en       | periprosthetic infection                                      | -            | -       | -       | X            | -              | 1                    |
|                                                | en       | implant related infection                                     | -            | X       | -       | -            | -              | 1                    |
|                                                | en       | osteomyelitis                                                 | -            | X       | -       | -            | X              | 1                    |
|                                                | de       | tiefe infektion                                               | -            | X       | X       | -            | -              | 1                    |
|                                                | de       | pintraktinfektion                                             | -            | -       | -       | -            | X              | 1                    |
| Superficial or deep                            | en       | soft tissue infection                                         | -            | X       | -       | -            | -              | 1                    |
|                                                | en       | postoperative infection                                       | -            | -       | -       | X            | -              | 3                    |
| Late hematogenous infections                   | de       | prothesenspätfekt                                             | -            | -       | -       | X            | -              | 1                    |
| <b>8- Superficial soft tissue events</b>       |          |                                                               |              |         |         |              |                |                      |
| Early events                                   | en       | wound healing problem                                         | -            | X       | -       | -            | -              | 1                    |
|                                                | en       | wound dehiscence                                              | -            | -       | -       | X            | -              | 1                    |
|                                                | en       | wound healing problems                                        | -            | X       | -       | -            | -              | 1                    |
|                                                | en       | blister                                                       | -            | X       | -       | -            | -              | 1                    |
|                                                | en       | skin numbness                                                 | -            | X       | -       | -            | -              | 1                    |
|                                                | en       | soft-tissue injury                                            | -            | -       | X       | -            | -              | 1                    |
|                                                | en       | soft-tissue stripping                                         | -            | X       | -       | -            | -              | 1                    |
| Late: hypertrophic scar and keloid             | en       | scar tissue                                                   | -            | -       | -       | -            | X              | 1                    |
|                                                | en       | scarring                                                      | -            | X       | X       | -            | -              | 1                    |
|                                                | en       | shortening of the soft tissue                                 | -            | -       | -       | -            | X              | 1                    |
|                                                | en       | soft tissue retraction                                        | -            | X       | -       | -            | -              | 1                    |

| Event group and specification terms                    | Language | Extracted event terms                             | Non-surgical | Plating | Nailing | Arthroplasty | Other surgical | Number of references |
|--------------------------------------------------------|----------|---------------------------------------------------|--------------|---------|---------|--------------|----------------|----------------------|
| <b>9- Deep soft tissue events</b>                      |          |                                                   |              |         |         |              |                |                      |
| Affecting the subacromial / subcoracoidal space        | en       | bursitis                                          | -            | -       | X       | -            | -              | 1                    |
|                                                        | en       | periarticular adhesions                           | -            | X       | -       | -            | -              | 1                    |
|                                                        | en       | reduced subacromial space                         | -            | -       | -       | X            | -              | 1                    |
| Impingement                                            | en       | soft tissue impingement                           | -            | X       | -       | -            | -              | 1                    |
|                                                        | en       | post-operative impingement                        | -            | X       | -       | -            | -              | 1                    |
|                                                        | en       | plate impingement                                 | -            | X       | -       | -            | -              | 2                    |
|                                                        | en       | impingement                                       | X            | X       | X       | X            | X              | 18                   |
|                                                        | en       | impingement syndrome                              | -            | X       | -       | -            | -              | 3                    |
|                                                        | en       | decreased abduction with impingement              | -            | -       | -       | X            | -              | 1                    |
|                                                        | en       | greater tuberosity impingement                    | -            | X       | -       | -            | -              | 1                    |
|                                                        | en       | hardware impingement                              | -            | X       | -       | -            | -              | 1                    |
|                                                        | en       | implant impingement                               | -            | X       | -       | -            | -              | 1                    |
|                                                        | en       | implant related impingement                       | -            | X       | -       | -            | -              | 2                    |
|                                                        | en       | mechanical impingement                            | -            | -       | -       | X            | -              | 1                    |
|                                                        | en       | mechanical complications                          | -            | X       | -       | -            | -              | 1                    |
|                                                        | de       | mechanisches hindernis bei der schulterbewegung   | -            | -       | X       | -            | -              | 1                    |
|                                                        | de       | plattenimpingement                                | -            | X       | -       | -            | -              | 2                    |
| Acromial Impingement                                   | en       | acromial impingement                              | -            | X       | -       | -            | -              | 1                    |
|                                                        | en       | syndrome under-acromial                           | -            | -       | X       | -            | -              | 1                    |
|                                                        | en       | subacromial dislocation of the greater tuberosity | -            | X       | -       | -            | -              | 1                    |
|                                                        | en       | subacromial impingement syndrom                   | -            | X       | -       | -            | -              | 1                    |
|                                                        | en       | subacromial impingement                           | X            | X       | X       | X            | -              | 14                   |
|                                                        | en       | plate impingement with the acromion               | -            | X       | -       | -            | -              | 1                    |
| Affecting the biceps                                   | en       | tenosynovitis of the long head of the biceps      | -            | X       | -       | -            | -              | 1                    |
|                                                        | en       | biceps pathology                                  | -            | X       | X       | -            | X              | 1                    |
|                                                        | en       | lesion of the long head of the biceps             | -            | X       | -       | -            | -              | 1                    |
|                                                        | en       | secondary retraction and pain (biceps)            | -            | -       | -       | X            | -              | 1                    |
|                                                        | de       | verletzung lange bizepssehne intraoperativ        | -            | -       | X       | -            | -              | 1                    |
| Affecting the capsule (shoulder stiffness, metallosis) | en       | arthrofibrosis                                    | -            | X       | -       | -            | -              | 2                    |
|                                                        | en       | unable to elevate the arm above the scapular axis | -            | -       | X       | -            | -              | 1                    |
| Adhesive capsulitis                                    | en       | frozen shoulder                                   | X            | X       | -       | -            | -              | 4                    |
|                                                        | en       | adhesive capsulitis                               | X            | X       | -       | -            | X              | 3                    |
|                                                        | en       | capsulitis                                        | X            | X       | X       | X            | X              | 3                    |

| Event group and specification terms | Language | Extracted event terms                                   | Non-surgical | Plating | Nailing | Arthroplasty | Other surgical | Number of references |
|-------------------------------------|----------|---------------------------------------------------------|--------------|---------|---------|--------------|----------------|----------------------|
|                                     | en       | stiffness of shoulder                                   | -            | -       | -       | X            | -              | 1                    |
|                                     | en       | shoulder stiffness                                      | X            | X       | X       | -            | -              | 6                    |
|                                     | en       | intractable stiffness                                   | -            | -       | -       | X            | -              | 1                    |
|                                     | en       | postoperative stiffness                                 | -            | X       | -       | -            | X              | 1                    |
|                                     | en       | stiffness                                               | X            | X       | X       | X            | X              | 20                   |
|                                     | de       | steifigkeit                                             | X            | X       | X       | -            | -              | 1                    |
| Affecting the rotator cuff          | en       | violation of supraspinatus on greater tuberosity        | -            | -       | X       | -            | -              | 1                    |
|                                     | en       | secondary rotator cuff damage                           | -            | -       | -       | X            | -              | 1                    |
|                                     | en       | secondary rotator cuff insufficiency                    | -            | X       | -       | -            | -              | 1                    |
|                                     | en       | secondary cuff failure                                  | -            | -       | -       | X            | -              | 1                    |
|                                     | en       | secondary cuff rupture                                  | -            | -       | -       | X            | -              | 1                    |
|                                     | en       | rotator cuff pain                                       | X            | -       | X       | -            | -              | 2                    |
|                                     | en       | rotator cuff symptoms                                   | -            | X       | X       | X            | -              | 3                    |
|                                     | en       | rotator cuff tear                                       | X            | X       | X       | -            | X              | 1                    |
|                                     | en       | rotator cuff tendon tear                                | -            | X       | X       | -            | -              | 2                    |
|                                     | en       | rotator cuff damage                                     | -            | -       | X       | X            | -              | 2                    |
|                                     | en       | rotator cuff defect                                     | -            | X       | -       | -            | -              | 1                    |
|                                     | en       | rotator cuff dysfunction                                | X            | -       | X       | X            | -              | 5                    |
|                                     | en       | rotator cuff injury                                     | X            | -       | X       | -            | -              | 3                    |
|                                     | en       | rotator cuff irritation                                 | -            | -       | X       | -            | -              | 1                    |
|                                     | en       | rotator cuff lesion                                     | -            | -       | X       | -            | -              | 2                    |
|                                     | en       | rotator cuff malfunction                                | -            | -       | -       | X            | -              | 1                    |
|                                     | en       | iatrogenic rotator cuff injury                          | -            | -       | X       | -            | -              | 1                    |
|                                     | en       | hemiarthroplasty: rotator cuff failure                  | -            | -       | -       | X            | -              | 1                    |
|                                     | en       | complete rotator cuff tears subscap                     | -            | X       | X       | -            | -              | 1                    |
|                                     | en       | complete rotator cuff tears supraspinatus               | -            | X       | X       | -            | -              | 1                    |
|                                     | en       | concomitant lesions of the tendons of the rotator cuff  | -            | -       | X       | -            | -              | 1                    |
|                                     | en       | cuff related complications                              | -            | -       | -       | X            | -              | 1                    |
|                                     | en       | cuff tear                                               | -            | -       | X       | X            | -              | 2                    |
|                                     | en       | cuff tear rupture                                       | -            | -       | -       | X            | -              | 1                    |
|                                     | en       | cuff violation                                          | -            | -       | X       | -            | -              | 1                    |
|                                     | en       | damage to the rotator cuff                              | -            | -       | X       | -            | -              | 1                    |
|                                     | en       | defect in the supraspinatus                             | -            | X       | -       | -            | -              | 1                    |
|                                     | en       | dysfunction of the rotator cuff                         | X            | -       | -       | X            | -              | 2                    |
|                                     | en       | disconnection of rotator cuff tendons from tuberosities | -            | X       | -       | -            | -              | 1                    |
|                                     | en       | excessive tension of the supraspinatus muscle           | -            | -       | -       | X            | -              | 1                    |

| Event group and specification terms        | Language | Extracted event terms                           | Non-surgical | Plating | Nailing | Arthroplasty | Other surgical | Number of references |
|--------------------------------------------|----------|-------------------------------------------------|--------------|---------|---------|--------------|----------------|----------------------|
|                                            | en       | extensive tension of the supraspinatus tendon   | -            | -       | -       | X            | -              | 1                    |
|                                            | de       | direkte irritation der rotatorenmanschette      | -            | -       | X       | -            | -              | 1                    |
|                                            | de       | schädigung des ansatzes der rotatorenmanschette | -            | -       | X       | -            | -              | 1                    |
|                                            | de       | sekundäre rotatorenmanschettendefekte           | -            | -       | -       | X            | -              | 1                    |
| Affecting the deltoid                      | en       | weakening of deltoid muscle                     | -            | -       | -       | X            | -              | 1                    |
|                                            | en       | deltoid muscle damage                           | -            | X       | -       | -            | -              | 1                    |
|                                            | en       | deltoid paresis                                 | -            | -       | -       | X            | -              | 1                    |
| Other                                      | en       | separation of the muscular flap                 | -            | -       | -       | X            | -              | 1                    |
|                                            | en       | seroma                                          | -            | -       | -       | X            | -              | 1                    |
| <b>NON-LOCAL EVENTS</b>                    |          |                                                 |              |         |         |              |                |                      |
| <b>1, Anaphylactic / allergic reaction</b> |          |                                                 |              |         |         |              |                |                      |
|                                            | en       | allergic reaction to metals                     | -            | X       | -       | -            | -              | 1                    |
| <b>2, Neuro-psychiatric event</b>          |          |                                                 |              |         |         |              |                |                      |
| <b>3, Cardiovascular event</b>             |          |                                                 |              |         |         |              |                |                      |
|                                            | en       | sepsis                                          | -            | X       | X       | X            | -              | 2                    |
|                                            | en       | septic shock                                    | -            | -       | -       | X            | -              | 1                    |
|                                            | en       | myocardial infarction                           | -            | -       | -       | X            | -              | 1                    |
|                                            | en       | acute myocardial infarction                     | -            | -       | -       | X            | -              | 1                    |
|                                            | en       | anemia                                          | X            | X       | X       | X            | X              | 1                    |
|                                            | en       | blood loss                                      | -            | X       | X       | -            | -              | 1                    |
|                                            | en       | cardiac arrest                                  | -            | -       | -       | X            | -              | 1                    |
|                                            | en       | deep venous thrombosis                          | -            | -       | -       | X            | -              | 1                    |
|                                            | en       | dvt                                             | X            | X       | X       | X            | X              | 2                    |
|                                            | en       | lymphatic edema                                 | -            | -       | -       | X            | -              | 1                    |
|                                            | en       | lymphedema                                      | -            | -       | -       | X            | -              | 1                    |
|                                            | en       | lymphoedema                                     | -            | -       | -       | X            | -              | 1                    |
|                                            | en       | neurovascular complications                     | -            | X       | -       | -            | -              | 1                    |
|                                            | en       | neurovascular damage                            | -            | X       | X       | -            | X              | 2                    |
|                                            | en       | neurovascular injury                            | -            | X       | X       | -            | X              | 2                    |
|                                            | en       | cerebrovascular accident                        | -            | -       | -       | X            | -              | 1                    |
| <b>4, Pulmonary event</b>                  |          |                                                 |              |         |         |              |                |                      |
|                                            | en       | hydropneumothorax                               | -            | -       | -       | -            | X              | 1                    |
|                                            | en       | pneumonia                                       | X            | X       | X       | X            | X              | 3                    |
|                                            | en       | pulmonary embolism                              | -            | -       | -       | X            | X              | 1                    |

| Event group and specification terms           | Language | Extracted event terms                                            | Non-surgical | Plating | Nailing | Arthroplasty | Other surgical | Number of references |
|-----------------------------------------------|----------|------------------------------------------------------------------|--------------|---------|---------|--------------|----------------|----------------------|
|                                               | en       | pulmonary embolus                                                | -            | -       | -       | X            | -              | 1                    |
|                                               | en       | respiratory failure                                              | -            | -       | -       | X            | -              | 1                    |
| <b>5, Urinary tract event</b>                 |          |                                                                  |              |         |         |              |                |                      |
|                                               | en       | diabetes mellitus with chronic renal failure                     | -            | -       | -       | X            | -              | 1                    |
| <b>6, Gastrointestinal event</b>              |          |                                                                  |              |         |         |              |                |                      |
|                                               |          |                                                                  |              |         |         |              |                |                      |
| <b>7, Musculoskeletal system</b>              |          |                                                                  |              |         |         |              |                |                      |
|                                               | en       | decubitus                                                        | -            | X       | -       | -            | -              | 1                    |
|                                               | en       | fibular graft harvest site leg pain                              | -            | X       | -       | -            | -              | 1                    |
| <b>Excluded terms (no unfavorable events)</b> |          |                                                                  |              |         |         |              |                |                      |
| Too general term                              | en       | local complications                                              | -            | -       | -       | -            | X              | 1                    |
|                                               | en       | complication of humeral head replacement                         | -            | X       | X       | X            | X              | 1                    |
|                                               | en       | complication of surgical fixation                                | -            | X       | X       | X            | X              | 1                    |
|                                               | en       | implant related problems                                         | -            | X       | X       | X            | X              | 1                    |
|                                               | en       | hardware complications                                           | -            | -       | X       | -            | -              | 1                    |
|                                               | en       | mechanical problems                                              | -            | -       | -       | -            | X              | 1                    |
|                                               | en       | perioperative morbidity                                          | -            | X       | X       | -            | -              | 1                    |
| Influencing factors                           | en       | compromising the vascularization of bone fragments               | -            | X       | -       | -            | -              | 1                    |
|                                               | en       | jeopardizing the survival of the bone fragments                  | -            | X       | -       | -            | -              | 1                    |
|                                               | en       | head diaphysis angle                                             | -            | X       | -       | -            | -              | 1                    |
|                                               | en       | medial metaphysis reconstruction                                 | -            | X       | -       | -            | -              | 1                    |
|                                               | en       | postoperative anatomy score=quality of reconstruction of anatomy | -            | X       | -       | -            | -              | 1                    |
|                                               | en       | greater tuberosity height                                        | -            | X       | -       | -            | -              | 1                    |
|                                               | en       | lateral metaphyseal comminution                                  | -            | -       | X       | -            | -              | 1                    |
| Choice of implant                             | en       | incorrect humeral version                                        | -            | X       | -       | -            | -              | 1                    |
|                                               | de       | zu lange zementierstrecke                                        | -            | -       | -       | X            | -              | 1                    |
| Treatment issues                              | en       | lack of tuberosity fixation to prosthesis                        | -            | -       | -       | X            | -              | 1                    |
|                                               | en       | höhere reoperationsrate                                          | -            | X       | X       | -            | X              | 1                    |
|                                               | en       | need for secondary surgery                                       | -            | X       | X       | X            | -              | 1                    |
|                                               | en       | secondary removal of the hardware                                | -            | -       | -       | -            | X              | 1                    |
|                                               | en       | need for implant removal                                         | -            | -       | -       | -            | X              | 1                    |
|                                               | en       | hardware removal                                                 | -            | -       | X       | -            | -              | 1                    |
|                                               | en       | metallentfernung                                                 | -            | -       | -       | -            | X              | 1                    |

| <b>Excluded terms<br/>(no unfavorable events)</b> | <b>Language</b> | <b>Extracted event terms</b>                                            | <b>Non-surgical</b> | <b>Plating</b> | <b>Nailing</b> | <b>Arthroplasty</b> | <b>Other surgical</b> | <b>Number of references</b> |
|---------------------------------------------------|-----------------|-------------------------------------------------------------------------|---------------------|----------------|----------------|---------------------|-----------------------|-----------------------------|
|                                                   | en              | reoperation                                                             | -                   | X              | X              | -                   | -                     | 2                           |
|                                                   | en              | revision                                                                | -                   | -              | -              | X                   | -                     | 1                           |
|                                                   | en              | non-compliance with rehabilitation                                      | -                   | -              | -              | X                   | -                     | 1                           |
| Outcome issues                                    | en              | restriction of the glenohumeral joint during arm elevation              | -                   | -              | X              | -                   | -                     | 1                           |
|                                                   | en              | restricted abduction                                                    | X                   | X              | X              | X                   | X                     | 1                           |
|                                                   | en              | restriction in rom                                                      | -                   | -              | X              | -                   | -                     | 1                           |
|                                                   | en              | restriction of internal or external rotation motion and forward flexion | -                   | -              | -              | X                   | -                     | 1                           |
|                                                   | en              | restriction of range of motion                                          | -                   | -              | -              | X                   | -                     | 1                           |
|                                                   | en              | loss of motion                                                          | -                   | -              | -              | X                   | -                     | 2                           |
|                                                   | en              | limited rom                                                             | -                   | -              | X              | -                   | -                     | 1                           |
|                                                   | en              | decreased range of motion                                               | X                   | -              | -              | X                   | X                     | 2                           |
|                                                   | en              | restriction of strength                                                 | -                   | -              | -              | X                   | -                     | 1                           |
|                                                   | en              | loss of function                                                        | -                   | -              | -              | X                   | -                     | 1                           |
|                                                   | en              | loss of lifting strength                                                | -                   | -              | -              | X                   | -                     | 1                           |
|                                                   | en              | death                                                                   | -                   | X              | X              | X                   | X                     | 2                           |
|                                                   | en              | discomfort                                                              | -                   | X              | -              | -                   | -                     | 1                           |
