# Supplementary material for: Complications after surgical management of proximal humeral fractures: a systematic review of event terms and definitions
Source: Springer Nature journal article supplement (doi:10.1186/s12891-020-03353-8), 2020-05-26
Supplement: MOESM4 [file 18015986]

## Supplementary file 4

**Article title** Complications after surgical management of proximal humeral fractures: a systematic review of event terms and definitions  
**Journal name** BMC Musculoskeletal Disorders  
**Author names** Alispahic N, Brorson S, Bahrs C, Joeris A, Steinitz A, Audigé L  
**Corresponding author** Laurent Audigé, Schulthess Klinik, CH-8008 Zurich, Switzerland  
**e-mail address** laurent.audige@kws.ch

### Extracted definitions related to specific event terms

#### Malunion

| Authors                               | Year | Term Used                                 | Definition                                                                                                                                                                                                                                                                                                                                                         | Adapted from                        | Cited by                       |
|---------------------------------------|------|-------------------------------------------|--------------------------------------------------------------------------------------------------------------------------------------------------------------------------------------------------------------------------------------------------------------------------------------------------------------------------------------------------------------------|-------------------------------------|--------------------------------|
| Sohn et al. <sup>47</sup> †           | 2014 | Malreduction                              | Head-shaft angle < 120° or > 140°, measured on immediate postoperative radiographs                                                                                                                                                                                                                                                                                 | Brunner et al. 2009 <sup>11</sup>   | Sohn et al. 2017 <sup>46</sup> |
| Bahrs et al. <sup>7</sup>             | 2015 | Malunion                                  | Residual bone deformities at time of follow-up after healing measured on AP and axillary radiographic views (varus / valgus angulation on the AP view [ $\pm 15^\circ$ ] AND/OR anteversion or retroversion on the axillary view [ $\pm 15^\circ$ ]) AND/OR tuberosity displacement with reference to the opposite side, with or tuberosity displacement of > 5 mm | Bahrs et al. 2010 <sup>6</sup>      |                                |
| Okike et al. <sup>36</sup>            | 2015 | Malunion                                  | Healing in varus, valgus or translation alone                                                                                                                                                                                                                                                                                                                      |                                     |                                |
| Gracitelli et al. <sup>19</sup>       | 2016 | Varus malunion                            | Neck-shaft angle $\leq 110^\circ$                                                                                                                                                                                                                                                                                                                                  |                                     |                                |
| Esenyel et al. <sup>14</sup>          | 2017 | Tuberosity malposition (hemiarthroplasty) | Tuberosity position of more than 5 mm above or more than 10mm below the prosthetic head                                                                                                                                                                                                                                                                            |                                     |                                |
| Hao et al. <sup>22</sup>              | 2017 | Varus malunion                            | Neck-shaft angle $\leq 110^\circ$                                                                                                                                                                                                                                                                                                                                  |                                     |                                |
| Villodre-Jimenez et al. <sup>53</sup> | 2017 | Arm lengthening > 20mm                    | Difference in the acromion-epicondyle distance in the radiographic checks of the operated arm compared to the contralateral arm                                                                                                                                                                                                                                    | Lädermann et al. 2009 <sup>30</sup> |                                |

† not from the initial literature search

## Delayed healing / nonunion

| Authors                               | Year | Term Used                | Definition                                                                                                                                     | Adapted from                    | Cited by                             |
|---------------------------------------|------|--------------------------|------------------------------------------------------------------------------------------------------------------------------------------------|---------------------------------|--------------------------------------|
| Vannabouathong et al. <sup>51</sup>   | 2011 | Nonunion                 | Absence of callus uniting the main fracture fragments in 3 of the 4 bone cortices                                                              |                                 | Gracitelli et al. 2016 <sup>19</sup> |
| Papakonstantinou et al. <sup>38</sup> | 2017 | Delayed union / nonunion | Delayed union = Union between 61 and 89 days; it is defined as prolonged after 90 days.<br>Nonunion = When fractures had not united by 90 days | Sheck et al. 1982 <sup>42</sup> |                                      |

## Secondary fracture displacement

| Authors                          | Year | Term Used                         | Definition                                                                                                                                                                                                                                                                                                       | Adapted from                                                                                               | Cited by                            |
|----------------------------------|------|-----------------------------------|------------------------------------------------------------------------------------------------------------------------------------------------------------------------------------------------------------------------------------------------------------------------------------------------------------------|------------------------------------------------------------------------------------------------------------|-------------------------------------|
| Platzer et al. <sup>40</sup> †   | 2005 | Tuberosity displacement           | Displacement >5mm.                                                                                                                                                                                                                                                                                               | Park et al. 1997 <sup>39</sup>                                                                             | Kancherla et al. 2017 <sup>26</sup> |
| Ockert et al. <sup>35</sup> †    | 2010 | Secondary varus displacement      | Displacement >10° or the CCD angle (centrum collum diaphyseal angle)                                                                                                                                                                                                                                             |                                                                                                            | Handoll et al. 2015 <sup>21</sup>   |
| Bahrs et al. <sup>7</sup>        | 2015 | Secondary fracture displacement   | Secondary fracture displacement at follow-up (defined as > 5° difference of CCD angle or > 5 mm secondary fracture displacement of the greater tuberosity under consideration of the radiographs after fracture stabilization and FU for AP and axillary views and for tuberosity displacement for the AP view). | Brunner et al. 2009 <sup>11</sup><br>Helwig et al. 2009 <sup>23</sup><br>Roderer et al. 2011 <sup>41</sup> |                                     |
| Doursounian et al. <sup>15</sup> | 2016 | Displacement of the humeral head  | More than 10% displacement in the diameter of the humeral head (i.e. 5 mm for 50 mm diameter).                                                                                                                                                                                                                   |                                                                                                            |                                     |
| Doursounian et al. <sup>15</sup> | 2016 | Displacement of the tuberosities  | 30° or more change in angle of a bone fragment                                                                                                                                                                                                                                                                   |                                                                                                            |                                     |
| Gonc et al. <sup>18</sup>        | 2016 | Varus progression                 | Head-shaft angle < 130° postoperatively is considered a sign of varus progression                                                                                                                                                                                                                                | Acklin et al. 2013 <sup>2</sup><br>Sohn et al. 2014 <sup>47</sup>                                          |                                     |
| Gracitelli et al. <sup>19</sup>  | 2016 | Loss of reduction of humeral head | Change of the neck shaft angle ≥ 10°                                                                                                                                                                                                                                                                             |                                                                                                            |                                     |

### Secondary fracture displacement (continued)

| Authors                            | Year | Term Used                                   | Definition                                                                                                                                               | Adapted from                        | Cited by |
|------------------------------------|------|---------------------------------------------|----------------------------------------------------------------------------------------------------------------------------------------------------------|-------------------------------------|----------|
| Gracitelli et al. <sup>19</sup>    | 2016 | Loss of reduction of the greater tuberosity | Displacement of the greater tuberosity $\geq$ 0.5 cm                                                                                                     |                                     |          |
| Hao et al. <sup>22</sup>           | 2017 | Loss of reduction in tuberosities           | Displacement of a tuberosity > 5 mm                                                                                                                      |                                     |          |
| Shukla et al. <sup>44</sup>        | 2017 | Varus re-collapse                           | In patients with an initial varus fracture pattern, neck- shaft angle < 120° as measured on an anteroposterior radiograph with 20° of external rotation. | Agudelo et al. 2007 <sup>4</sup>    |          |
| Sohn et al. <sup>46</sup>          | 2017 | Varus collapse                              | Significantly progressive change of the head-shaft angle with < 120° from the immediate postoperative radiograph to the final follow-up evaluation       | Brunner et al. 2009 <sup>11</sup>   |          |
| Wolfensperger et al. <sup>55</sup> | 2017 | Displacement                                | Migration > 5 mm compared with the postoperative radiographs                                                                                             | Kralinger et al. 2004 <sup>29</sup> |          |

† not from the initial literature search

### Humeral head necrosis

| Authors                        | Year | Term Used          | Definition                                                                                                                                         | Adapted from | Cited by                                                                 |
|--------------------------------|------|--------------------|----------------------------------------------------------------------------------------------------------------------------------------------------|--------------|--------------------------------------------------------------------------|
| Fjalestad et al. <sup>17</sup> | 2012 | Avascular necrosis | Classification system:<br>2 = no changes;<br>1 = changes to normal trabecular organization < 50% of humeral head;<br>0 = > 50% or partial collapse |              | Fjalestad et al. 2014 <sup>16</sup><br>Handoll et al. 2015 <sup>21</sup> |

## Implant failure

| Authors                           | Year | Term Used        | Definition                                                                                                     | Adapted from                    | Cited by |
|-----------------------------------|------|------------------|----------------------------------------------------------------------------------------------------------------|---------------------------------|----------|
| Haasters et al. <sup>20</sup>     | 2016 | Loss of fixation | Decreased head-shaft angulation of > 10° in the anteroposterior or lateral plane.                              | Acklin et al. 2012 <sup>1</sup> |          |
| Vijayvargiya et al. <sup>52</sup> | 2016 | Failure          | Backing out of the screw, plate breakage / pull-out, malunion, nonunion or avascular necrosis of humeral head. |                                 |          |

## Screw perforation/cut out

| Authors                          | Year | Term Used                                                | Definition                                                                                                                                                   | Adapted from                                                           | Cited by                          |
|----------------------------------|------|----------------------------------------------------------|--------------------------------------------------------------------------------------------------------------------------------------------------------------|------------------------------------------------------------------------|-----------------------------------|
| Clavert et al. <sup>13</sup>     | 2010 | Screw cutout                                             | Results through high plate position and inadequate screw length                                                                                              | Agudelo et al. 2007 <sup>4</sup><br>Owsley et al. 2008 <sup>37</sup>   | Bohsali et al. 2017 <sup>9</sup>  |
| Lopez et al. <sup>31</sup>       | 2014 | Protrusion of the osteosynthesis material                | Subacromial protrusion with impingement or articular intrusion of the screws                                                                                 |                                                                        | Handoll et al. 2015 <sup>21</sup> |
| Spross et al. <sup>48</sup>      | 2014 | Secondary screw cut-out                                  | Locked screws do not allow any slip back and the screw tips slowly protrude through the head fragment into the joint, also known as secondary screw cut-out. | Naranja et al. 2000 <sup>33</sup><br>Jost et al. 2013 <sup>25</sup>    | Ayoub et al. 2017 <sup>5</sup>    |
| Konighausen et al. <sup>28</sup> | 2015 | Secondary perforation (Sekundäre Perforation)            | Resintering of separate screws after loss of reduction (Nachsintern einzelner Schrauben bei Repositionsverlust)                                              |                                                                        |                                   |
| Konighausen et al. <sup>28</sup> | 2015 | Primary screw perforation (primäre Schraubenperforation) | Intraoperative overlooked iatrogenic screw protrusion (Intraoperativ übersehene Schraubenüberstände, Iatrogen bedingt)                                       |                                                                        |                                   |
| Aguado et al. <sup>3</sup>       | 2016 | Screw joint penetration                                  | Screw going into the joint                                                                                                                                   |                                                                        |                                   |
| Brunner et al. <sup>12</sup>     | 2017 | Primary screw perforation (primäre Schraubenperforation) | Already intraoperative apparent screw joint perforation (intraoperativ bereits ersichtliche intraartikuläre Perforation)                                     | Brunner et al. 2009 <sup>11</sup><br>Südkamp et al. 2009 <sup>49</sup> |                                   |

### Notching (specific radiological parameter of the reversed prosthesis)

| Authors                        | Year | Term Used | Definition                                                                                                                                        | Adapted from                                                                                                                                                                           | Cited by |
|--------------------------------|------|-----------|---------------------------------------------------------------------------------------------------------------------------------------------------|----------------------------------------------------------------------------------------------------------------------------------------------------------------------------------------|----------|
| Hernandez et al. <sup>24</sup> | 2015 | Notching  | Notching is the erosion of the scapular neck secondary to its contact with the humeral component of the implant during upper extremity adduction. | Sirveaux et al. 2004 <sup>45</sup>                                                                                                                                                     |          |
| Obert et al. <sup>34</sup>     | 2016 | Groove    | A groove on the lower side of the neck of the scapula classified according to 1) Sirveaux Classification 2) Nerot Classification                  | Valenti et al, 2001 <sup>50</sup><br>Sirveaux et al. 2004 <sup>45</sup><br>Baulot et al. 2007 <sup>8</sup><br>Klein et al. 2008 <sup>27</sup><br>Mattiassich et al. 2013 <sup>32</sup> |          |

### Stiffness

| Authors                          | Year | Term Used          | Definition                                                                                                                                                                                                                          | Adapted from                   | Cited by                       |
|----------------------------------|------|--------------------|-------------------------------------------------------------------------------------------------------------------------------------------------------------------------------------------------------------------------------------|--------------------------------|--------------------------------|
| Sohn et al. <sup>47</sup>        | 2014 | Shoulder stiffness | Limitation of active and passive motion compared to the contralateral shoulder in at least two directions (forward flexion < 120° or 50% restriction of external rotation and internal rotation compared to the contralateral side) | Shin et al. 2013 <sup>43</sup> | Sohn et al. 2017 <sup>46</sup> |
| Bonnevialle et al. <sup>10</sup> | 2016 | Stiffness          | A passive anterior elevation of less than 80°, associated or not with a passive external rotation of the elbow at the side of less than 10° at the final follow-up was considered to be stiffness.                                  |                                |                                |

### Nerve lesion

| Authors                       | Year | Term Used             | Definition                                                                                                                                                             | Adapted from | Cited by |
|-------------------------------|------|-----------------------|------------------------------------------------------------------------------------------------------------------------------------------------------------------------|--------------|----------|
| Westphal et al. <sup>54</sup> | 2017 | Axillary nerve lesion | Electromyography findings were defined as suspect when the distal latency was longer or the amplitude was reduced by more than 50% compared with the healthy shoulder. |              |          |

## References

- 1 Acklin Y, Sommer C. Plate fixation of proximal humerus fractures using the minimally invasive anterolateral delta split approach. *Oper Orthop Traumatol* 2012;24:61-73.
- 2 Acklin YP, Stoffel K, Sommer C. A prospective analysis of the functional and radiological outcomes of minimally invasive plating in proximal humerus fractures. *Injury* 2013;44:456-460. doi: 10.1016/j.injury.2012.09.010
- 3 Aguado HJ, Mingo J, Torres M, Alvarez-Ramos A, Martín-Ferrero MA. Minimally invasive polyaxial locking plate osteosynthesis for 3–4 part proximal humeral fractures: our institutional experience. *Injury* 2016;47:S22-S28.
- 4 Agudelo J, Schurmann M, Stahel P, Helwig P, Morgan SJ, Zechel W et al. Analysis of efficacy and failure in proximal humerus fractures treated with locking plates. *J Orthop Trauma* 2007;21:676-681. doi: 10.1097/BOT.0b013e31815bb09d
- 5 Ayoub MA, Gad H, El-Tantawy A, Atef A, Seleem OA. Geriatric complex proximal humeral fracture: intraoperative locking plate problems and proposed solutions. *Current Orthopaedic Practice* 2017;28:70-78. doi: 10.1097/BCO.0000000000000456
- 6 Bahrs C, Badke A, Rolauffs B, Weise K, Zipplies S, Dietz K et al. Long-term results after non-plate head-preserving fixation of proximal humeral fractures. *Int Orthop* 2010;34:883-889. doi: 10.1007/s00264-009-0848-4
- 7 Bahrs C, Kuhle L, Blumenstock G, Stockle U, Rolauffs B, Freude T. Which parameters affect medium- to long-term results after angular stable plate fixation for proximal humeral fractures? *J Shoulder Elbow Surg* 2015;24:727-732. doi: <http://dx.doi.org/10.1016/j.jse.2014.08.009>
- 8 Baulot E, Valenti P, Garaud P, Boileau P, Neyton L, Sirveaux F et al. Résultats des prothèses inversées. *Revue de Chirurgie Orthopédique et Réparatrice de l'Appareil Moteur* 2007;93:63-92. doi: 10.1016/s0035-1040(07)92712-9
- 9 Bohsali K, A. Bois, and M. Wirth, . Fractures of the Proximal Humerus, in. In: C.A. Rockwood ea, Editors., editor. *Rockwood and Matsen's the shoulder*. Elsevier, Inc.; 2017. p. 183-242.
- 10 Bonneville N, Tournier C, Clavert P, Ohl X, Sirveaux F, Saragaglia D et al. Hemiarthroplasty versus reverse shoulder arthroplasty in 4-part displaced fractures of the proximal humerus: Multicenter retrospective study. *Orthop Traumatol Surg Res* 2016;102:569-573. doi: 10.1016/j.otsr.2016.02.014
- 11 Brunner F, Sommer C, Bahrs C, Heuwinkel R, Hafner C, Rillmann P et al. Open reduction and internal fixation of proximal humerus fractures using a proximal humeral locked plate: a prospective multicenter analysis. *J Orthop Trauma* 2009;23:163-172. doi: 10.1097/BOT.0b013e3181920e5b
- 12 Brunner U. Kopferhaltende Therapie der proximalen Humerusfraktur. In: Habermeyer P, Lichtenberg S, Loew M, Magosch P, Martetschläger F, Tauber M, editors. *Schulterchirurgie*. München: Elsevier GmbH; 2017. p. 484-534.
- 13 Clavert P, Adam P, Bevort A, Bonnomet F, Kempf JF. Pitfalls and complications with locking plate for proximal humerus fracture. *J Shoulder Elbow Surg* 2010;19:489-494. doi: 10.1016/j.jse.2009.09.005
- 14 CZ. E. Proximal Humerus Fractures. In: Huri G PN, editors., editor. *The Shoulder*; 2017.
- 15 Doursounian L, Le Sant A, Mauprivez R, Miquel A, Beauthier-Landauer V. Open reduction and internal fixation of three- and four-part proximal humeral fractures by intra-focal distraction: observational study of twenty five cases. *Int Orthop* 2016;40:2373-2382. doi: 10.1007/s00264-015-3109-8
- 16 Fjalestad T, Hole MØ. Displaced proximal humeral fractures: operative versus non-operative treatment—a 2-year extension of a randomized controlled trial. *Eur J Orthop Surg Traumatol* 2014;24:1067-1073.
- 17 Fjalestad T, Hole MO, Hovden IA, Blucher J, Stromsoe K. Surgical treatment with an angular stable plate for complex displaced proximal humeral fractures in elderly patients: a randomized controlled trial. *J Orthop Trauma* 2012;26:98-106. doi: 10.1097/BOT.0b013e31821c2e15

- 18 Gonc U, Atabek M, Teker K, Tanriover A. Minimally invasive plate osteosynthesis with PHILOS plate for proximal humerus fractures. *Acta Orthop Traumatol Turc* 2017;51:17-22. doi: 10.1016/j.aott.2016.10.003
- 19 Gracitelli ME, Malavolta EA, Assuncao JH, Kojima KE, dos Reis PR, Silva JS et al. Locking intramedullary nails compared with locking plates for two- and three-part proximal humeral surgical neck fractures: a randomized controlled trial. *J Shoulder Elbow Surg* 2016;25:695-703. doi: 10.1016/j.jse.2016.02.003
- 20 Haasters F, Siebenbürger G, Helfen T, Daferner M, Böcker W, Ockert B. Complications of locked plating for proximal humeral fractures—are we getting any better? *J Shoulder Elbow Surg* 2016;25:e295-e303.
- 21 Handoll HH, Brorson S. Interventions for treating proximal humeral fractures in adults. *Cochrane Database Syst Rev* 2015:CD000434. doi: 10.1002/14651858.CD000434.pub4
- 22 Hao TD, Huat AWT. Surgical technique and early outcomes of intramedullary nailing of displaced proximal humeral fractures in an Asian population using a contemporary straight nail design. *J Orthop Surg (Hong Kong)* 2017;25:2309499017713934. doi: <https://dx.doi.org/10.1177/2309499017713934>
- 23 Helwig P, Bahrs C, Epple B, Oehm J, Eingartner C, Weise K. Does fixed-angle plate osteosynthesis solve the problems of a fractured proximal humerus? A prospective series of 87 patients. *Acta Orthop* 2009;80:92-96.
- 24 Hernández-Elena J, de la Red-Gallego MÁ, Garcés-Zarzalejo C, Pascual-Carra MA, Pérez-Aguilar MD, Rodríguez-López T et al. Treatment of proximal humeral fractures by reverse shoulder arthroplasty: Mid-term evaluation of functional results and Notching. *Revista Española de Cirugía Ortopédica y Traumatología (English Edition)* 2015;59:413-420. doi: 10.1016/j.recote.2015.09.005
- 25 Jost B, Spross C, Grehn H, Gerber C. Locking plate fixation of fractures of the proximal humerus: analysis of complications, revision strategies and outcome. *J Shoulder Elbow Surg* 2013;22:542-549. doi: 10.1016/j.jse.2012.06.008
- 26 Kancherla VK, Singh A, Anakwenze OA. Management of Acute Proximal Humeral Fractures. *J Am Acad Orthop Surg* 2017;25:42-52. doi: 10.5435/JAAOS-D-15-00240
- 27 Klein M, Juschka M, Hinkenjann B, Scherger B, Ostermann PA. Treatment of comminuted fractures of the proximal humerus in elderly patients with the Delta III reverse shoulder prosthesis. *J Orthop Trauma* 2008;22:698-704. doi: 10.1097/BOT.0b013e31818afe40
- 28 Königshausen M, Thierbach A, Kübler L, Gessmann J, Godry H, Gothner M et al. Surgical treatment of 3- and 4-part fractures of the humeral head using a polyaxial-locking plate: results and patient satisfaction. *Z Orthop Unfall* 2015;153:51-58.
- 29 Kralinger F, Schwaiger R, Wambacher M, Farrell E, Menth-Chiari W, Lajtai G et al. Outcome after primary hemiarthroplasty for fracture of the head of the humerus. A retrospective multicentre study of 167 patients. *J Bone Joint Surg Br* 2004;86:217-219.
- 30 Ladermann A, Williams MD, Melis B, Hoffmeyer P, Walch G. Objective evaluation of lengthening in reverse shoulder arthroplasty. *J Shoulder Elbow Surg* 2009;18:588-595. doi: 10.1016/j.jse.2009.03.012
- 31 Lopiz Y, Garcia-Coiradas J, Garcia-Fernandez C, Marco F. Proximal humerus nailing: a randomized clinical trial between curvilinear and straight nails. *J Shoulder Elbow Surg* 2014;23:369-376.
- 32 Mattiassich G, Marcovici LL, Kriffter RM, Ortmaier R, Wegerer P, Kroepfl A. Delta III reverse shoulder arthroplasty in the treatment of complex 3- and 4-part fractures of the proximal humerus: 6 to 42 months of follow up. *BMC Musculoskelet Disord* 2013;14:231. doi: 10.1186/1471-2474-14-231
- 33 Naranja RJ, Jr., Iannotti JP. Displaced three- and four-part proximal humerus fractures: evaluation and management. *J Am Acad Orthop Surg* 2000;8:373-382.

- 34 Obert L, Saadnia R, Tournier C, Bonneville N, Saragaglia D, Sirveaux F et al. Four-part fractures treated with a reversed total shoulder prosthesis: Prospective and retrospective multicenter study. Results and complications. *Orthop Traumatol Surg Res* 2016;102:279-285. doi: 10.1016/j.otsr.2016.01.019
- 35 Ockert B, Braunstein V, Kirchhoff C, Korner M, Kirchhoff S, Kehr K et al. Monoaxial versus polyaxial screw insertion in angular stable plate fixation of proximal humeral fractures: radiographic analysis of a prospective randomized study. *J Trauma* 2010;69:1545-1551. doi: 10.1097/TA.0b013e3181c9b8a7
- 36 Okike K, Lee OC, Makenji H, Morgan JH, Harris MB, Vrahas MS. Comparison of locked plate fixation and nonoperative management for displaced proximal humerus fractures in elderly patients. *Am J Orthop* 2015;44:E106-112.
- 37 Owsley KC, Gorczyca JT. Fracture displacement and screw cutout after open reduction and locked plate fixation of proximal humeral fractures [corrected]. *J Bone Joint Surg Am* 2008;90:233-240. doi: 10.2106/JBJS.F.01351
- 38 Papakonstantinou MK, Hart MJ, Farrugia R, Gosling C, Kamali Moaveni A, van Bavel D et al. Prevalence of non-union and delayed union in proximal humeral fractures. *ANZ J Surg* 2017;87:55-59. doi: <https://dx.doi.org/10.1111/ans.13756>
- 39 Park TS, Choi IY, Kim YH, Park MR, Shon JH, Kim SI. A new suggestion for the treatment of minimally displaced fractures of the greater tuberosity of the proximal humerus. *Bull Hosp Jt Dis* 1997;56:171-176.
- 40 Platzer P, Kutscha-Lissberg F, Lehr S, Vecsei V, Gaebler C. The influence of displacement on shoulder function in patients with minimally displaced fractures of the greater tuberosity. *Injury* 2005;36:1185-1189. doi: 10.1016/j.injury.2005.02.018
- 41 Röderer G, Erhardt J, Kuster M, Vegt P, Bahrs C, Kinzl L et al. Second generation locked plating of proximal humerus fractures—a prospective multicentre observational study. *Int Orthop* 2011;35:425-432.
- 42 Scheck M. Surgical treatment of nonunions of the surgical neck of the humerus. *Clinical orthopaedics and related research* 1982:255-259. doi: 10.1016/j.injury.2005.02.018
- 43 Shin S-J, Lee S-Y. Efficacies of corticosteroid injection at different sites of the shoulder for the treatment of adhesive capsulitis. *J Shoulder Elbow Surg* 2013;22:521-527.
- 44 Shukla DR, McAnany S, Pean C, Overley S, Lovy A, Parsons BO. The results of tension band rotator cuff suture fixation of locked plating of displaced proximal humerus fractures. *Injury* 2017;48:474-480. doi: 10.1016/j.injury.2016.12.022
- 45 Sirveaux F, Leroux J, Roche O, Gosselin O, De Gasperi M, Molé D. Traitement de l'instabilité postérieure de l'épaule par butée iliaque ou acromiale. *Revue de Chirurgie Orthopédique et Réparatrice de l'Appareil Moteur* 2004;90:411-419. doi: 10.1016/s0035-1040(04)70167-1
- 46 Sohn HS, Jeon YS, Lee J, Shin SJ. Clinical comparison between open plating and minimally invasive plate osteosynthesis for displaced proximal humeral fractures: A prospective randomized controlled trial. *Injury* 2017;48:1175-1182. doi: 10.1016/j.injury.2017.03.027
- 47 Sohn HS, Shin SJ. Minimally invasive plate osteosynthesis for proximal humeral fractures: clinical and radiologic outcomes according to fracture type. *J Shoulder Elbow Surg* 2014;23:1334-1340. doi: <http://dx.doi.org/10.1016/j.jse.2013.12.018>
- 48 Spross C, Jost B, Rahm S, Winklhofer S, Erhardt J, Benninger E. How many radiographs are needed to detect angular stable head screw cut outs of the proximal humerus—a cadaver study. *Injury* 2014;45:1557-1563.
- 49 Südkamp N, Bayer J, Hepp P, Voigt C, Oestern H, Käb M et al. Open reduction and internal fixation of proximal humeral fractures with use of the locking proximal humerus plate: results of a prospective, multicenter, observational study. *J Bone Joint Surg Am* 2009;91:1320-1328.
- 50 Valenti PH, Bouttens D, Nerot C. Delta 3 reversed prosthesis for osteoarthritis with massive rotator cuff tear, long term results (>5 years). In: Walch G, Boileau P, Molé D, editors. *Shoulder prostheses: two to ten year follow-up*. Montpellier: Sauramps Medical; 2001. p. 253-259.



- 51 Vannabouathong C, Sprague S, Bhandari M. Guidelines for fracture healing assessments in clinical trials. Part I: definitions and endpoint committees. *Injury* 2011;42:314-316. doi: 10.1016/j.injury.2010.11.048
- 52 Vijayvargiya M, Pathak A, Gaur S. Outcome Analysis of Locking Plate Fixation in Proximal Humerus Fracture. *J Clin Diagn Res* 2016;10:RC01-05. doi: 10.7860/JCDR/2016/18122.8281
- 53 Villodre-Jimenez J, Estrems-Diaz V, Diranzo-Garcia J, Bru-Pomer A. Reverse shoulder arthroplasty in 3 and 4 part proximal humeral fractures in patients aged more than 65 years: Results and complications. *Rev Esp Cir Ortop Traumatol* 2017;61:43-50. doi: <https://dx.doi.org/10.1016/j.recot.2016.09.005>
- 54 Westphal T, Woischnik S, Adolf D, Feistner H, Piatek S. Axillary nerve lesions after open reduction and internal fixation of proximal humeral fractures through an extended lateral deltoid-split approach: electrophysiological findings. *J Shoulder Elbow Surg* 2017;26:464-471.
- 55 Wolfensperger F, Gruninger P, Dietrich M, Vollink M, Benninger E, Schlappi M et al. Reverse shoulder arthroplasty for complex fractures of the proximal humerus in elderly patients: impact on the level of independency, early function, and pain medication. *J Shoulder Elbow Surg* 2017;26:1462-1468. doi: 10.1016/j.jse.2017.01.021
